1 **Title:** Early life adversity and adult social relationships have independent effects on survival in a  
2 wild animal model of aging

3 **Short title:** Early life, social behavior, and survival  
4

## 5 **Authors**

6 Elizabeth C. Lange<sup>1</sup>, Shuxi Zeng<sup>2</sup>, Fernando A. Campos<sup>3</sup>, Fan Li<sup>2</sup>, Jenny Tung<sup>1,5,6,7</sup>,  
7 Elizabeth A. Archie<sup>4</sup>, and Susan C. Alberts<sup>1,5,6,\*</sup>

8

## 9 **Affiliations**

10 <sup>1</sup>Department of Biology, Duke University, Durham NC, USA

11 <sup>2</sup>Department of Statistical Science, Duke University, Durham NC, USA

12 <sup>3</sup>Department of Anthropology, University of Texas at San Antonio, San Antonio TX,  
13 USA

14 <sup>4</sup>Department of Biological Sciences, University of Notre Dame, Notre Dame IN, USA

15 <sup>5</sup>Department of Evolutionary Anthropology, Duke University, Durham NC, USA

16 <sup>6</sup>Duke Population Research Institute, Duke University, Durham NC, USA

17 <sup>7</sup>Department of Primate Behavior and Evolution, Max Planck Institute for Evolutionary  
18 Anthropology, Leipzig, Germany

19 \*Corresponding author

20

## 21 **Abstract**

22 Does social isolation in adulthood predict survival because socially isolated individuals  
23 are already unhealthy due to adversity earlier in life (health selection)? Or do adult social  
24 environments directly cause poor health and increased mortality risk (“social causation”)?  
25 These alternative hypotheses are difficult to disentangle in humans because prospective  
26 data on survival and the environment for both early life and adulthood are rarely  
27 available. Using data from the baboon population of Amboseli, Kenya, a model for  
28 human behavior and aging, we show that early adversity and adult social isolation  
29 contribute independently to reduced adult survival, in support of both health selection and  
30 social causation. Further, strong social bonds and high social status can buffer some  
31 negative effects of early adversity on survival. These results support a growing change in  
32 perspective, away from “either-or” hypotheses and towards a multi-causal perspective  
33 that points to multiple opportunities to mitigate the effects of social adversity.

34

## 35 **Teaser**

36 Early life environments and adult social bonds have strong, but largely independent  
37 effects on survival in wild baboons.

## 38 Introduction

39 In humans and other animals, the experience of harsh conditions in early life can have  
40 profound effects on adult health and survival (1-5). For example, one recent study found that  
41 American children who experience more than three sources of socioenvironmental adversity  
42 before age 18 can expect a 9.5 year reduction in quality-adjusted adult life expectancy (1).  
43 Importantly, adversity during early life is also linked to social adversity in adulthood, including  
44 both low socioeconomic status (SES) and challenges in forming strong and supportive social  
45 relationships (6-8). In turn, low SES and social isolation/low social support are linked to poor  
46 health and all-cause mortality (9-12). However, while early life adversity, poor adult social  
47 relationships, and low adult social status have all been linked to poor adult survival, the causal  
48 relationships between these factors are not well understood.

49 Specifically, while most hypotheses acknowledge that early life environments can affect  
50 both adult health and the adult social environment (Figure 1; 13, 14, competing hypotheses differ  
51 in the extent to which they identify adult health (driven by early adversity) as the cause or  
52 consequence of differences in adult social relationships. For instance, the health selection  
53 hypothesis posits that poor health status affects the adult social environment, preventing  
54 attainment of high social (or socioeconomic) status and compromising the formation of strong  
55 social relationships (15; Figure 1A). Under this scenario, poor health—arising from early life  
56 adversity or some other source—is the primary cause of both adverse social environments and  
57 poor health/survival in adulthood. Alternatively, the social causation hypothesis posits that social  
58 isolation and low social status in adulthood play a direct, causal role in the connection between  
59 the social environment, health, and survival (10, 16). Under this scenario, poor social  
60 relationships and/or low social status in adulthood are sufficient to trigger poor health/survival in  
61 adulthood (Figure 1B). Thus, while early life adversity may also contribute to variation in health  
62 and/or the social environment, enhancements to the social environment in adulthood are viable  
63 paths to improving adult health and lifespan. The causal effects of adult social environments may  
64 act in parallel to the effects of early adversity or function as a source of resilience against the  
65 costs of early adversity (i.e., the “social buffering” hypothesis; 17-19).

66 Distinguishing between health selection and social causation is important to both  
67 evolutionary biologists and social scientists. Understanding what forces drive variation in  
68 survival helps to identify the traits targeted by natural selection, shedding light on the  
69 evolutionary underpinnings of early life effects and sociality. At the same time, understanding  
70 the causes of variation in health and mortality can inform investment in public health  
71 interventions and policy. However, despite extensive research on the pathways linking early  
72 experience and adult life outcomes, the relative importance of health selection versus social  
73 causation in explaining social environmental effects on adult survival is widely debated (13, 20-  
74 24).

75 To address this debate, the best approach is to link prospectively collected data on early  
76 life adversity and prospectively collected information on the adult social environment and  
77 survival in the same individuals (20, 25). Existing data typically do not permit such analyses in  
78 human populations, but appropriate data are sometimes available for wild animal populations  
79 that have been under continuous observation for many years (9). Further, the social determinants  
80 of health in many social mammal species resemble those described in humans, making wild  
81 animal models a useful tool for dissecting the relationships among early life adversity, adult

82 social behavior, and lifespan. For example, in several nonhuman mammals, early life adversity is  
83 linked to low adult social status or weak adult social relationships (26-29). Similarly, low social  
84 status or weak social relationships are associated with higher mortality rates in a range of social  
85 mammal species (9).

86 In this study, we use a mediation analysis framework to examine the relationships among  
87 early life adversity, adult social behavior, and survival in an established wild animal model of  
88 aging: the baboons studied by the Amboseli Baboon Research Project in the Amboseli  
89 ecosystem, Kenya (30, 31). Our goals were to determine the relative importance of health  
90 selection and social causation in explaining survival patterns in adult female baboons, and to  
91 determine whether adult social relationships buffer the effects of early life adversity. We focused  
92 on adult females because male baboons disperse from their natal social groups when they  
93 mature, making it difficult to distinguish male dispersal from death (32).

94 If health selection explains the link between adult phenotypes and survival, two  
95 predictions ensue: (i) early adversity should predict weak adult social relationships, and (ii) early  
96 adversity should have a direct effect on adult survival that is not mediated by adult social  
97 relationships (Figure 1A). This pattern would support the idea that poor health arising from early  
98 adversity leads to both social isolation and poor survival in adulthood. In contrast, social  
99 causation predicts (i) that adult social bonds have strong, direct effects on survival, and (ii) that  
100 these effects occur regardless of a female's early life experience (Figure 1B). Such a pattern  
101 would support the idea that the effect of early life adversity on survival is at least partly mediated  
102 by its effects on adult social relationships. Finally, the social buffering hypothesis, which is  
103 consistent with social causation, would be supported if the effects of early life adversity on adult  
104 survival are moderated by adult social behavior.

105 Previous work on female baboons in Amboseli has shown that harsh early life  
106 environments predict reduced adult female lifespan (26, 33) as well as a moderate degree of  
107 social isolation in adulthood (26, 34). In addition, in adult females, weak social bonds predict  
108 decreased lifespan (35, 36). However, no previous study in either animals or humans has sought  
109 to prospectively link early life adversity, adult social behavior, and survival in an integrated  
110 analysis. Therefore, it is unknown if adult social relationships have independent effects on  
111 survival or merely act as mediators that link early life to survival. We focus on adult female  
112 social bonds as candidate mediators, and we exclude adult social status as a potential mediator  
113 for two reasons: (i) previous studies in this population find no effects of female social status on  
114 survival (35, 36), and (ii) preliminary analyses using our mediation framework ruled out social  
115 status as a potential mediator of early life adversity and demonstrated that social status is not  
116 influenced by cumulative early life adversity (see Materials and Methods). However, in our test  
117 of the social buffering hypothesis, we consider both adult social bonds and adult social status as  
118 possible moderators of the relationship between early life and survival.

### A. Health Selection Hypothesis

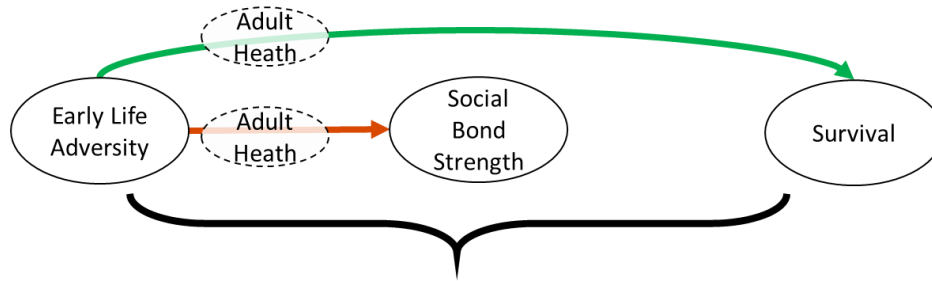

### B. Social Causation Hypothesis

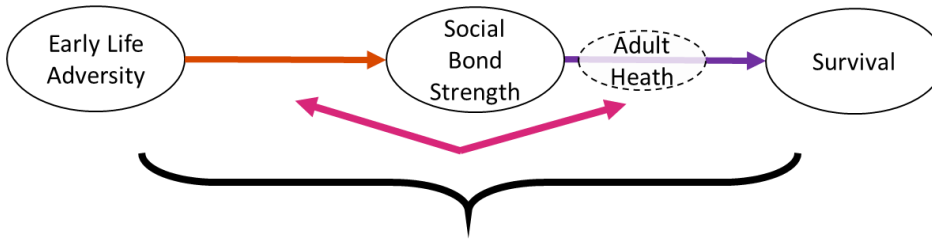

### C. Mediation Analysis Framework

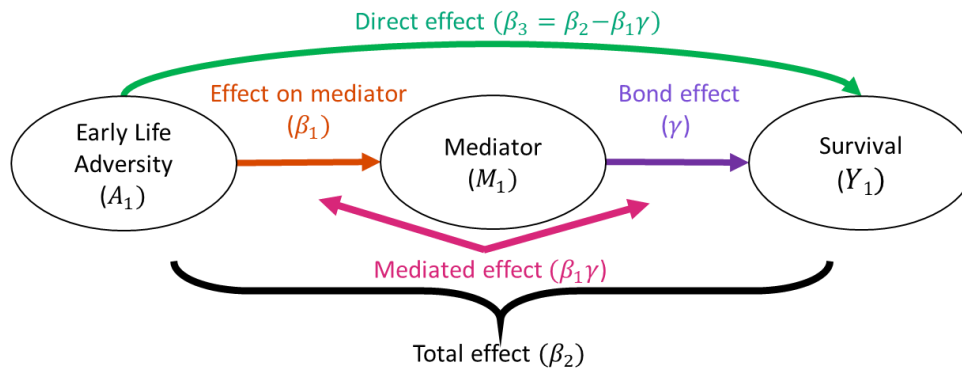

119

120 **Figure 1.** Hypotheses and mediation analysis framework and hypotheses linking early life  
 121 adversity, adult social bond strength, and survival. The health selection hypothesis (A) posits that  
 122 poor adult health arising from early life adversity prevents individuals from forming strong  
 123 social relationships. Under health selection, we predict a link between early adversity and adult  
 124 social bond strength (orange arrow), and a direct link between early adversity and survival (green  
 125 arrow) outside of the pathway that includes social bond strength, but no mediated effect (pink  
 126 arrow in B, C), and no independent effects of social bond strength on survival (purple arrow in  
 127 B, C). The social causation hypothesis (B) predicts that social bond strength is a direct cause of  
 128 survival differences (purple arrow). It also predicts that any effects of early life environments on  
 129 survival, at least as they relate to social relationships, are due to a mediated effect (pink arrow)  
 130 where early adversity affects adult social bond strength (orange arrow), which in turn affects  
 131 survival (purple arrow). Under social causation, early life adversity may affect survival via other  
 132 pathways (e.g., green arrow in A), but social relationships have an important causal effect. (C)  
 133 The mediation analysis models the links between early life adversity ( $A_1$ ), adult mediator  
 134 phenotypes ( $M_1$ , social bond strength with females or males), and survival ( $Y_1$ ). Mediation  
 135 models produce estimates of (i) the direct effect of early life adversity on survival outside of the

136 pathway that includes the mediator ( $\beta_3$ , green arrow), (ii) the mediated effect of early life  
 137 adversity on survival through the pathway that includes the mediator ( $\beta_1\gamma$ , pink arrow), (iii) the  
 138 effect of early life adversity on the mediator ( $\beta_1$ , orange arrow), (iv) the effect of the mediator on  
 139 survival independent of early adversity ( $\gamma$ , purple arrow, the bond effect), and (v) the total effects  
 140 on survival ( $\beta_2$ , black bracket). Note that the expressions  $\beta_1\gamma$  and ( $\beta_3 = \beta_2 - \beta_1\gamma$ ) in panel C  
 141 hold exactly only when all models (between  $A$ ,  $M$ , and  $Y$ ) are linear. Here we use these merely as  
 142 notations (instead of mathematical equations) to label the qualitative relationship between total,  
 143 mediated, direct, and bond effects.

144

## 145 **Mediation and moderation frameworks**

146 *Mediation models.* Our mediation analysis framework is based on structural equation  
 147 models that examine the links between early life, adult social phenotypes, and survival (Figure  
 148 1C, 37-39). The 199 females in this study were observed from birth and survived to at least four  
 149 years old, approximately the earliest age of reproductive maturation (average age at menarche =  
 150  $4.73 \pm 0.56$  years). For each female, we evaluated her exposure to six different adverse  
 151 socioenvironmental conditions in early life: 1) drought in the first year of life, 2) large group size  
 152 at birth, 3) low maternal social status at birth, 4) low maternal social connectedness during the  
 153 first two years of life, 5) the presence of a close-in-age younger sibling, and 6) maternal loss  
 154 before four years of age (Table 1; 26, 33, 34).

155 **Table 1.** Sources of early life adversity and the number of females that experienced each source.

| Source of Adversity               | Description                                                                                         | N of females who experienced adversity | N of females who did not experience adversity |
|-----------------------------------|-----------------------------------------------------------------------------------------------------|----------------------------------------|-----------------------------------------------|
| Drought                           | <200 mm of rainfall during the first year of life                                                   | 28                                     | 171                                           |
| Large group size                  | Group size in the top quartile (> 33 adults) at the subject's birth, indicating high social density | 32                                     | 167                                           |
| Close-in-age younger sibling      | Younger sibling born less than 1.5 years after the subject's birth                                  | 40                                     | 159                                           |
| Maternal loss                     | Mother dies during the first four years of the subject's life                                       | 38                                     | 161                                           |
| Low maternal social status        | Mother's proportional dominance rank in the lowest quartile at the subject's birth                  | 46                                     | 153                                           |
| Low maternal social connectedness | Mother's social connectedness in the lowest quartile during the subject's first two years of life   | 54                                     | 145                                           |

156 We constructed two sets of mediation models (see Materials and Methods), each with a  
 157 different mediator variable ( $M$ ), linking the treatment (early life adversity,  $A$ ) to survival ( $Y$ ,  
 158 measured by the hazard ratio,  $\lambda$ ; Figure 1C). The two mediators we examined were quantitative  
 159 measures of social bond strength with other adult females and with adult males (see *Potential*  
 160 *mediators*, below). Because both of these variables are known to be linked to adult survival (36),  
 161 either could act as a mediator of early life adversity. We considered a female's social bonds with  
 162 other adult females separately from her social bonds with adult males because same-sex and  
 163 opposite sex social relationships have different relationships with early adversity and with  
 164 survival and are not well-correlated (26, 34-36).

165 The mediation analysis enables us to break down the total effect of early life adversity on  
 166 survival ( $\beta_2$ , black arrow in Figure 1C) into direct ( $\beta_3$ ) and mediated ( $\beta_1\gamma$ ) effects. The direct  
 167 effect ( $\beta_3$ ) of early life adversity on survival is the pathway connecting these variables  
 168 independent of the mediator (green arrow in Figure 1C). The mediated (or indirect) effect ( $\beta_1\gamma$ ) is  
 169 the pathway connecting early life adversity and survival that runs through the mediator variable;  
 170 in our case, measures of social bond strength (pink arrows in Figure 1C). The mediation  
 171 framework also assesses the effect of early adversity on the mediator ( $\beta_1$ , orange arrow in Figure  
 172 1C) and the effect of the mediator on survival independent of early adversity, hereafter the 'bond  
 173 effect' ( $\gamma$ , purple arrow in Figure 1C).

174 For each of our mediators, we estimated the links between early life adversity ( $A$ ), social  
 175 bond strength ( $M$ ), and survival ( $Y$ , measured by the hazard ratio  $\lambda$ ) by fitting three equations as  
 176 proposed by Zeng, Lange, Archie, Campos, Alberts and Li (40); for more details see Materials  
 177 and Methods). The first equation evaluates the effect of early life adversity on observed values  
 178 for the mediator, conditional on covariates,  $C$ , and random effects,  $r$  (orange arrow in Figure  
 179 1C):

$$180 \quad M_{it} = M_i(t) = \beta_0(t) + A_i\beta_1(t) + \theta_1 C_{it}^M + r_{group} + \varepsilon_{it} \quad (1)$$

181 where  $i$  is individual and  $t$  is age class. Here  $\beta_1$  represents the effect of early adversity on social  
 182 bond strength. The second equation models the total effect of early life adversity on survival  
 183 (e.g., the change in hazard rate related to early adversity;  $\beta_2$ , black arrow in Figure 1C), which  
 184 does not differentiate between direct and mediated effects:

$$185 \quad \lambda(t|X_i, A_i) = \lambda_0(t) \exp(\tilde{\beta}_2 A_i + \theta_2 C_{it}^S + \tilde{r}) \quad (2)$$

186 The third equation is similar to Equation 2, but incorporates estimates of the mediator based on  
 187 the parameters previously fit for Equation 1. It allows us to estimate the value of the effect of the  
 188 mediator on survival given the estimate of the mediator  $f\{\alpha, M_i(t)\}$ :

$$189 \quad \lambda(t|X_i, A_i, M_{it}) = \lambda_0(t) \exp(\tilde{\beta}_3 A_i + f\{\alpha, M_i(t)\} + \theta_3 C_{it}^S + \tilde{r}) \quad (3a)$$

190 where the mediator component  $f\{\alpha, M_i(t)\}$  equals:

$$191 \quad f\{\alpha, M_i(t)\} = \int_0^{t_{max}} \alpha(u) M_i(u) du \quad (3b)$$

192 where  $t_{max}$  is the maximum lagged time (here three years) and  $\alpha(u)$  is a time varying constant.  
 193 Equation 3b estimates the mediator for the previous three years of life, based on values for the  
 194 covariates, early life adversity, and the effect sizes estimated in Equation 1 (i.e., Equation 3b is  
 195 fit based on estimated values of the mediator, not directly on observed data). We designate this



196 value the ‘three-year mediator value’, where each year corresponds to a female age class, starting  
197 on her birthday and ending one day before her subsequent birthday. We also considered models  
198 where the mediator was estimated based on the same year of life as survival (‘one-year mediator  
199 models’) and results are consistent with three-year mediator models (Tables S1, S2).

200 Note that the effects  $\beta_2$  and  $\beta_3$  in Figure 1C are not numerically identical to the  
201 coefficients  $\tilde{\beta}_2$  and  $\tilde{\beta}_3$  in Equation 2 and 3, respectively. While they are analogous to  $\beta_2$  and  $\beta_3$   
202 in terms of the effects they represent, they differ because of the nonlinear hazard scale and  
203 complex functional model adopted in the analysis (i.e., in practice, we analyze a decomposition  
204 of a functional form fit to the social relationship data rather than the estimated social bond values  
205 directly; see Zeng, Lange, Archie, Campos, Alberts and Li (40)). Similarly, the bond effect  $\gamma$  does  
206 not directly correspond to a specific model parameter. Instead,  $\beta_2, \beta_3$ , and  $\gamma$  are calculated from  
207 functions involving all parameters in Equations 1, 2 and 3 (see the Materials and Methods and  
208 derivations in Zeng, Lange, Archie, Campos, Alberts and Li (40)).

209 First, we modeled the effects of cumulative early adversity on both mediators (social  
210 bond strength with females and social bond strength with males) and on survival. We measured  
211 cumulative early adversity as a continuous variable representing the sum of the six individual  
212 sources of adversity for each subject. No individual had a cumulative adversity score greater than  
213 four (mean=1.196±0.936 SD). Second, we built multivariate models to assess the effect of each  
214 individual source of adversity on each mediator and on survival, while holding the other sources  
215 of adversity at zero. In these models of individual sources of adversity, each measure of  
216 adversity was modeled as a categorical variable (a value of one for subjects that experience the  
217 adverse event, and zero for those that did not).

218 Moderation models. To test the social buffering hypothesis, which posits that adult social  
219 relationships act as a source of resilience in the face of early adversity, we next treated three  
220 adult social phenotypes (social bond strength with females, social bond strength with males, and  
221 social status) as potential moderators instead of mediators of early life adversity. In contrast to  
222 the mediation models, the moderation models test whether the social phenotypes influence the  
223 strength and direction of the effect of early life adversity on survival without making causal  
224 assumptions about the pathways involved. Moderation is captured by the interaction between the  
225 exposure  $A_i$  and mediator  $M_i(t)$  with the interaction term  $A_i g\{\eta, M_i(t)\}$  in the following model:

$$226 \quad \lambda(t|X_i, A_i, M_{it}) = \lambda_0(t) \exp(\xi A_i + f\{\alpha, M_i(t)\} + A_i g\{\eta, M_i(t)\} + \theta C_{it}^S + \tilde{r}) \quad (4)$$

227 Therefore, this approach allows us to estimate how the effects of early adversity on survival vary  
228 across different levels of the social bonds or social status.

229

## 230 **Potential mediators and moderators**

231 Mediators. We measured each female’s social bond strength with females – i.e., the  
232 strength of her social bonds with her top three female partners in each year of her life – and each  
233 female’s social bond strength with males – the strength of her social bonds with her top three  
234 male partners in each year of her life – as two distinct potential mediators ( $M$ ) of the effects of  
235 early life adversity on survival. We used grooming relationships to assess social bond strength  
236 because grooming is the most prominent affiliative behavior in baboons and many other primates  
237 (41-44). These mediators were represented in Equations 2 and 3 as estimates over three-year  
238 periods (Equation 3b), based on the values of their covariates and the parameters fit in Equation

239 1. We also estimated mediators over shorter, one-year periods, as reported in Tables S1-S2;  
240 because all analyses based on shorter periods produced qualitatively similar results, we focus on  
241 the three-year estimates here.

242 *Moderators.* We considered adult social bond strength with females, adult bond strength  
243 with males, and adult social status as potential moderators. We assessed social bond strength  
244 using the same method described above (based on grooming relationships calculated as  
245 trajectories as in Equation 1). We assessed social status using observations of wins and losses in  
246 dyadic agonistic interactions between adult female study subjects. A female dominance matrix  
247 was created for each month based on these win/loss outcomes, and female ordinal dominance  
248 ranks were assigned by minimizing entries below the diagonal (45). We then scaled these ordinal  
249 rankings by group size and assigned to each female a ‘proportional dominance rank’ (46),  
250 calculated as  $[1 - (\text{ordinal rank} - 1) / (\text{number adult females} - 1)]$ . A female’s proportional  
251 dominance rank represents the proportion of adult females that she dominates. We first  
252 calculated annual mean values for social status for each subject, and then estimated their social  
253 status trajectories over three-year periods, given covariates and parameter estimates for an  
254 analogue of Equation 1, with  $M_{it}$  is redefined as annual mean proportional dominance rank  
255 instead of annual social bond strength (see also Methods) .

256

## 257 **Results**

258 *Cumulative early adversity and survival: Mediated effects are weak, direct effects are strong*

259 As expected, we found a strong total effect ( $\beta_2$ ) of cumulative early adversity on adult  
260 female survival, recapitulating previous work (Tables 2-3; black bracket in Figure 2; black points  
261 and lines in Figures S1-S2; 26, 33). Approximately 90% of the total effect (1.43 of 1.60 years of  
262 lost life per additional exposure and 1.45 of 1.59 years, for the models considering social bond  
263 strength with females and social bond strength with males, respectively) was explained by the  
264 direct effect ( $\beta_3$ ) of cumulative early adversity on survival, outside of the pathways that included  
265 social bonds with either sex (Tables 2-3; green arrows in Figure 2; green points and lines in  
266 Figures S1-S2). Thus, the lives of females who experience four sources of early life adversity are  
267 predicted to be 6.4 years shorter than those of females that experience none, on average. Of these  
268 six years, ~5.6 years would be explained by the effects of early adversity on survival,  
269 independent of mediation by social bonds. Results were similar if we estimated mediation effects  
270 over shorter, one-year periods instead of three-year periods (Tables S1-S2).

271 We also found substantial effects of both mediators ( $\gamma$ ) on survival, independent of  
272 effects of early life adversity. A one unit increase in social bond strength with either adult  
273 females or adult males predicted a 2.2-year improvement in survival, independent of the effects  
274 of early adversity, where one unit represents approximately 1.7 standard deviations for social  
275 bond strength with females and 1.4 SD for social bond strength with males (Tables 2-3; purple  
276 arrows in Figures 1; Figures S1-S2; see Tables S1-S2 for results with mediators estimated over  
277 shorter, one-year periods). While the effects of social bonds on survival broadly recapitulate  
278 previous findings in this population (35, 36), this analysis is the first to demonstrate that these  
279 effects remain strong after controlling for levels of early adversity.

280 Notably, despite the fact that cumulative early adversity significantly predicted weaker



281 social bonds with females ( $\beta_1$ , orange arrows in Figure 1C), and that stronger social bonds with  
282 both sexes predicted higher survival, mediated effects were weak in all of our models of  
283 cumulative adversity. Specifically, the pathway through social bonds with females improved  
284 lifespan by only 2.04 months (10.6%), compared to the 1.60 year reduction in lifespan for each  
285 additional source of adversity (the mediated effect,  $\beta_{1\gamma}$ , pink bracket in Figures 2A, S1; Table 2).  
286 This result may stem from the fact that the effect of cumulative early adversity on social bonds,  
287 while detectable, is relatively weak: early adversity is associated with a 0.09 unit decrease in  
288 social bonds with females, which is small compared to the 1 unit increase in social bonds with  
289 females necessary to produce a 2.2 year improvement in lifespan via the bond effect. Social  
290 bonds with males did not detectably mediate the relationship between cumulative early adversity  
291 and survival (Figures 2B, S2; Table 3).

292 Taken together, our results are not fully explained by either health selection or social  
293 causation. Health selection would predict a direct effect of early adversity (presumed to  
294 compromise adult health) on both social bond strength and survival, without a strong bond effect  
295 on survival. Instead, early life adversity and social bonds both appear to have direct, independent  
296 effects on survival that are of similar magnitudes. Consequently, a female baboon who  
297 experienced higher than average (1 SD above the mean) cumulative early life adversity, adult  
298 social bond strength with females, and adult social bond strength with males would be predicted  
299 to experience a 1.35 year reduction in lifespan attributable to her early life environment, a 1.29  
300 year improvement in lifespan attributable to her social bonds females in adulthood, and a 1.29  
301 year improvement in lifespan attributable to her social bonds with males in adulthood. In other  
302 words, both early adversity (likely via a route through poor adult health), and adult social  
303 behavior are important in determining survival in adulthood.

304 We next considered whether the weak mediation we observed – in spite of effects of  
305 early adversity on social bonds and of social bonds on survival – might result from a mismatch in  
306 the timing of these effects. To explore this possibility, we designed a simulation analysis in  
307 which we defined two stages corresponding to early and late adulthood. We then assigned early  
308 life effects on the mediator, and mediator effects on survival, in all possible combinations of  
309 early and late timing of effects (see Supplementary Text: “Simulation to explore the small  
310 mediated effect”). In our simulations, we fixed the values of both the effect of early adversity on  
311 the mediator (“Effect on mediator”, orange arrow in Figure 1C) and the effect of the mediator on  
312 survival (“Isolation effect”, purple arrow in Figure 1C). Even though the component parts of the  
313 mediated effect were kept constant in the simulations, the estimate of the overall mediated effect  
314 (pink arrows in Figure 1C) depended on the timing of these effects. Mediated effects were largest  
315 when the timing of early life and mediator effects were matched; i.e., when either (i) early  
316 adversity had its strongest effects on the mediator early in life *and* the mediator had its strongest  
317 effects on survival early in life, or (ii) early adversity had its strongest effects on the mediator  
318 late in life *and* the mediator had its strongest effects on survival late in life (see Supplementary  
319 Text: “Simulation to explore the small mediated effect”, Figure S4). The results of this  
320 simulation support the idea that the timing of these effects during the life course could play a role  
321 in determining the strength of the mediated effect. They further suggest that, in the Amboseli  
322 baboons, the timing of early life effects on adult social isolation may be mismatched with the  
323 timing of social bond effects on survival. This topic merits future exploration.

324

### A. Social bond strength with females as mediator

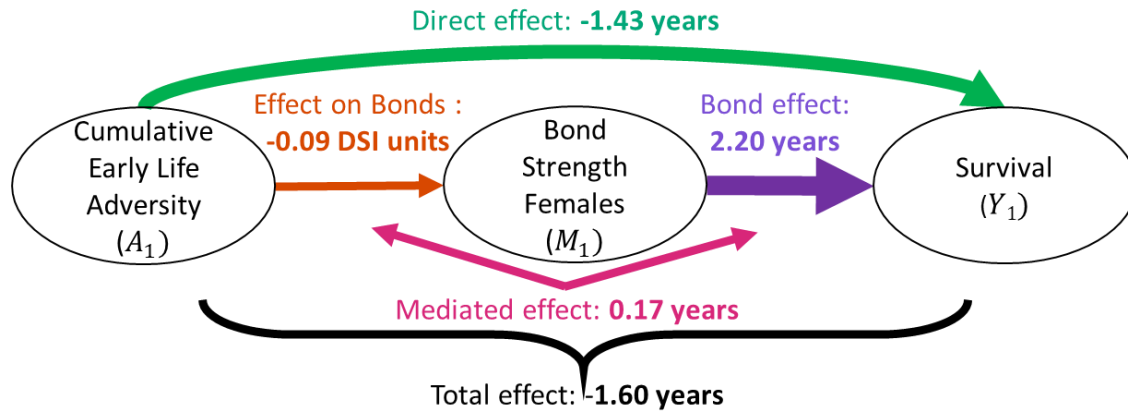

### B. Social bond strength with males as mediator

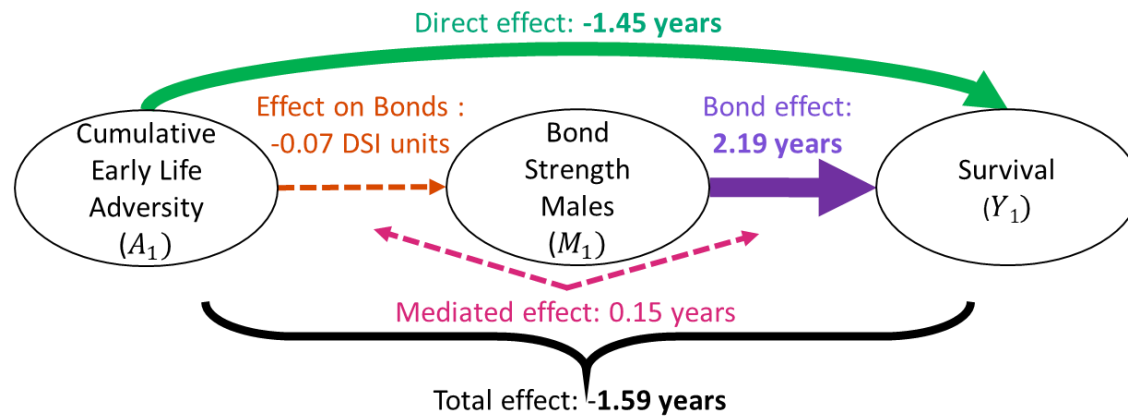

325

326 **Figure 2.** Mediation analysis results. (A) Results from our mediation model using social bond  
327 strength with adult females as the mediator. (B) Results from our mediation model using social  
328 bond strength with adult males as the mediator. Solid lines indicate effects for which 95%  
329 credible interval did not overlap zero, dashed lines indicate effects for which 95% credible  
330 interval did overlap zero.

331 **Table 2.** Mediation results from models in which social bond strength with females was the mediator. Total, direct, mediated and bond  
 332 effects are measured in years. The effect on the mediator is measured in social bond strength units (i.e., DSI units; 1 SD in social  
 333 bonds with females=0.59 DSI units). Bolded effects are those for which the 95% credible intervals (shown in brackets below each  
 334 effect size estimate) did not overlap zero. Effect names are colored as in Figure 1.

|                                   | Total effect<br>( $\beta_2$ , years) | Direct effect<br>( $\beta_3$ , years) | Mediated effect<br>( $\beta_1\gamma$ , years) | Effect on<br>mediator<br>( $\beta_1$ , DSI units) | Bond effect<br>( $\gamma$ , years) |
|-----------------------------------|--------------------------------------|---------------------------------------|-----------------------------------------------|---------------------------------------------------|------------------------------------|
| Drought                           | <b>-2.70</b><br>[-4.96, -0.44]       | <b>-2.26</b><br>[-4.04, -0.48]        | <b>0.44</b><br>[0.03, 0.85]                   | <b>-0.21</b><br>[-0.38, -0.03]                    | <b>2.19</b><br>[0.56, 3.82]        |
| Large group size                  | -1.60<br>[-4.02, 0.83]               | -1.38<br>[-2.89, 0.13]                | 0.22<br>[-0.01, 0.44]                         | -0.11<br>[-0.22, 0.01]                            | <b>2.39</b><br>[0.61, 4.17]        |
| Close-in-age younger sibling      | -0.90<br>[-5.45, 3.65]               | -0.59<br>[-1.99, 0.81]                | 0.31<br>[-0.04, 0.66]                         | <b>-0.15</b><br>[-0.28, -0.03]                    | <b>2.29</b><br>[0.75, 3.83]        |
| Maternal loss                     | <b>-3.30</b><br>[-5.79, -0.81]       | <b>-2.67</b><br>[-4.77, -0.57]        | <b>0.63</b><br>[0.06, 1.20]                   | <b>-0.26</b><br>[-0.47, -0.04]                    | <b>2.60</b><br>[0.79, 4.40]        |
| Low maternal social connectedness | 0.10<br>[-2.07, 2.27]                | 0.15<br>[-1.31, 1.62]                 | 0.05<br>[-0.17, 0.27]                         | -0.05<br>[-0.15, 0.06]                            | <b>2.60</b><br>[0.87, 4.34]        |
| Low maternal social status        | -1.80<br>[-4.37, 0.78]               | -1.36<br>[-2.90, 0.19]                | 0.44<br>[-0.05, 0.93]                         | <b>-0.14</b><br>[-0.25, -0.03]                    | <b>2.49</b><br>[0.66, 4.32]        |
| Cumulative adversity              | <b>-1.60</b><br>[-2.84, -0.36]       | <b>-1.43</b><br>[-2.52, -0.35]        | <b>0.17</b><br>[0.01, 0.32]                   | <b>-0.09</b><br>[-0.16, -0.01]                    | <b>2.20</b><br>[0.74, 3.65]        |

335

336 **Table 3.** Mediation results from models in which social bond strength with males was the mediator. Total, direct, mediated and bond  
 337 effect are measured in years. The effect on the mediator is measured in social bond strength units (i.e., DSI units; 1 SD in social bond  
 338 strength with males=0.70 DSI units). Bolded effects are those where the 95% credible intervals did not overlap zero. Effect names are  
 339 colored as in Figure 1.

|                                   | Total effect<br>( $\beta_2$ , years) | Direct effect<br>( $\beta_3$ , years) | Mediated effect<br>( $\beta_1\gamma$ , years) | Effect on<br>mediator<br>( $\beta_1$ , DSI units) | Bond effect<br>( $\gamma$ , years) |
|-----------------------------------|--------------------------------------|---------------------------------------|-----------------------------------------------|---------------------------------------------------|------------------------------------|
| Drought                           | <b>-2.70</b><br>[-4.96, -0.44]       | <b>-2.33</b><br>[-4.17, -0.50]        | <b>0.37</b><br>[0.02, 0.71]                   | <b>-0.16</b><br>[-0.29, -0.02]                    | <b>2.40</b><br>[0.62, 4.17]        |
| Large group size                  | -1.60<br>[-4.01, 0.82]               | -1.53<br>[-3.20, 0.15]                | 0.07<br>[-1.93, 2.07]                         | -0.04<br>[-0.92, 0.84]                            | <b>2.39</b><br>[0.61, 4.17]        |
| Close-in-age younger sibling      | -0.89<br>[-5.33, 3.55]               | -0.69<br>[-2.08, 0.70]                | 0.20<br>[-1.20, 1.60]                         | -0.11<br>[-0.61, 0.39]                            | <b>2.29</b><br>[0.75, 3.84]        |
| Maternal loss                     | <b>-3.30</b><br>[-5.78, -0.81]       | <b>-3.21</b><br>[-5.73, -0.68]        | 0.09<br>[-2.38, 2.56]                         | -0.06<br>[-1.95, 1.84]                            | <b>2.20</b><br>[0.67, 3.73]        |
| Low maternal social connectedness | 0.11<br>[-1.90, 2.12]                | 0.37<br>[-1.26, 1.99]                 | 0.26<br>[-0.15, 0.66]                         | -0.15<br>[-0.32, 0.02]                            | <b>2.20</b><br>[0.73, 3.66]        |
| Low maternal social status        | -1.80<br>[-4.38, 0.78]               | -1.16<br>[-2.70, 0.38]                | 0.64<br>[-0.07, 1.35]                         | <b>-0.25</b><br>[-0.44, -0.06]                    | <b>2.30</b><br>[0.61, 3.99]        |
| Cumulative adversity              | <b>-1.59</b><br>[-2.82, -0.36]       | <b>-1.45</b><br>[-2.54, -0.35]        | 0.15<br>[-0.33, 0.62]                         | -0.07<br>[-0.37, 0.22]                            | <b>2.19</b><br>[0.74, 3.64]        |

340

341 *Social bonds do not mediate the effects of individual sources of early adversity*

342 Similar to the effects of cumulative adversity, individual sources of adversity acted  
343 outside of the pathway that includes social bonds, with little evidence for mediated effects in our  
344 three-year mediator models (Tables 2-3; Figures S1-S2). More than 81% of the effects of  
345 individual sources of adversity were attributable to direct effects (87% if only considering  
346 significant direct effects). Among the six individual sources of early adversity, maternal loss and  
347 drought exerted the strongest and most consistent effects on both adult female survival and social  
348 bond strength with adult females (Tables 2-3; Figures S1-S2). Drought, but not maternal loss,  
349 was also linked to weaker social bonds with adult males. In contrast to the effects of maternal  
350 loss on social isolation from adult females, maternal loss did not predict social bond strength  
351 with adult males: the estimated effect size was near zero (0.06 DSI units; Table 3). Consistent  
352 with our main results, the effects of individual sources of adversity on survival were also not  
353 detectably mediated by measures of social bonds with either sex based on one-year intervals  
354 (Table S1-S2).

355

356 *Moderating effects: Social bonds buffer the effects of some sources of early adversity*

357 Neither social status nor social bond strength with either sex moderated the link between  
358 cumulative adversity and survival (Table 4; Figure 3A,B; results were similar when we used  
359 moderator trajectories estimated over a shorter, one-year period, Table S3). However, social  
360 bond strength with males and social bond strength with females both moderated the link between  
361 one individual source of adversity – maternal loss – and survival. Specifically, stronger social  
362 bonds with either females or with males during adulthood buffered the negative effect of  
363 maternal loss on survival (and conversely weaker social bonds amplified the negative effect of  
364 maternal loss on survival; Table 4, Table S3: Figure 3A,B,D,E). In other words, survival was  
365 disproportionately lower for females who lost their mother early in life and were more socially  
366 isolated in adulthood (and conversely, survival was disproportionately higher for females who  
367 lost their mother but formed strong social relationships in adulthood, with either sex; Figure  
368 3A,B,D,E). Females who lost their mother early in life but maintained strong social relationships  
369 with other females (1 SD above the mean) experienced a 10% reduction in hazard ratios relative  
370 to females who lost their mothers and had average social bond strength to other females. In  
371 contrast, females who lost their mothers and had weak social relationships with females (1 SD  
372 below the mean) had 16% higher hazard ratios than females who lost their mothers and had  
373 average social bond strength to other females (Figure 3D). The effect was stronger for bonds  
374 with males, where females who lost their mothers in early life but maintained strong social bonds  
375 with males (1 SD above the mean) had an 18% lower hazard ratio, while those who had weak  
376 social bonds with males (1 SD below the mean) had a 16% higher hazard ratio, compared to the  
377 effects of maternal loss for females with average social bond strength (Figure 3E). In addition,  
378 another individual source of early adversity – low maternal social connectedness – was buffered  
379 by strong adult social bonds with males, but not by adult social bonds with females (Figure 3B).

380 Female social status also moderated early life maternal loss and low maternal social  
381 connectedness effects on survival (Figure 3C, Table 4; note that this effect was not detectable  
382 when moderator trajectories were estimated over a shorter, one-year period, Table S3).  
383 Specifically, survival was disproportionately lower for low-ranking females who lost their  
384 mothers early in life or had a socially isolated mother, and disproportionately higher for high-



385 ranking females who lost their mothers early in life or had a socially isolated mother (Figure  
 386 3C,F). Females who lost their mother early in life, but were high social status in adulthood (1SD  
 387 above the mean) had a 5% lower hazard ratio compared to females who lost their mother but  
 388 were of average social status. In contrast, females who lost their mother early in life, but were  
 389 low social status in adulthood (1SD below the mean) had 20% higher hazard ratios, compared to  
 390 the effects of maternal loss for females with average social status.

391  
 392 **Table 4.** Moderation results from models in which social bond strength with females, social  
 393 bond strength with males, and female social status were the moderators. Values represent the  
 394 magnitude of the interaction effects measured in log hazard ratio (HR). Bolded effects (those for  
 395 which the 95% CI did not overlap zero) show that the effects of maternal loss on survival were  
 396 moderated by all three phenotypes and that the effects of low maternal social connectedness were  
 397 moderated by adult social relationships with males and female social status. A negative  
 398 interaction effect indicates that increased adult social bond strength or higher social status acts as  
 399 a buffer to reduce the negative effects of early adversity on survival. A positive interaction effect  
 400 value means that adult social bond strength or higher social status acts as an amplifier to increase  
 401 the negative effects of early adversity on survival.

|                                   | Social Bonds<br>w/ Females<br>(log HR) | Social Bonds<br>w/ Males<br>(log HR)  | Social Status<br>(log HR)             |
|-----------------------------------|----------------------------------------|---------------------------------------|---------------------------------------|
| Drought                           | -0.19<br>[-0.41, 0.03]                 | -0.13<br>[-0.33, 0.06]                | -0.07<br>[-0.29, 0.15]                |
| Large group size                  | 0.19<br>[-0.06, 0.44]                  | -0.12<br>[-0.27, 0.02]                | -0.19<br>[-0.40, 0.02]                |
| Close-in-age younger sibling      | 0.13<br>[-0.38, 0.64]                  | 0.00<br>[-0.33, 0.33]                 | 0.25<br>[-0.19, 0.69]                 |
| Maternal loss                     | <b>-0.26</b><br><b>[-0.39, -0.13]</b>  | <b>-0.21</b><br><b>[-0.3, -0.12]</b>  | <b>-0.18</b><br><b>[-0.33, -0.04]</b> |
| Low maternal social connectedness | 0.11<br>[-0.03, 0.26]                  | <b>-0.15</b><br><b>[-0.24, -0.06]</b> | <b>-0.19</b><br><b>[-0.37, -0.01]</b> |
| Low maternal social status        | 0.02<br>[-0.15, 0.18]                  | 0.04<br>[-0.04, 0.13]                 | -0.02<br>[-0.19, 0.16]                |
| Cumulative adversity              | -0.02<br>[-0.05, 0.01]                 | -0.03<br>[-0.05, 0.00]                | 0.02<br>[-0.02, 0.06]                 |

402

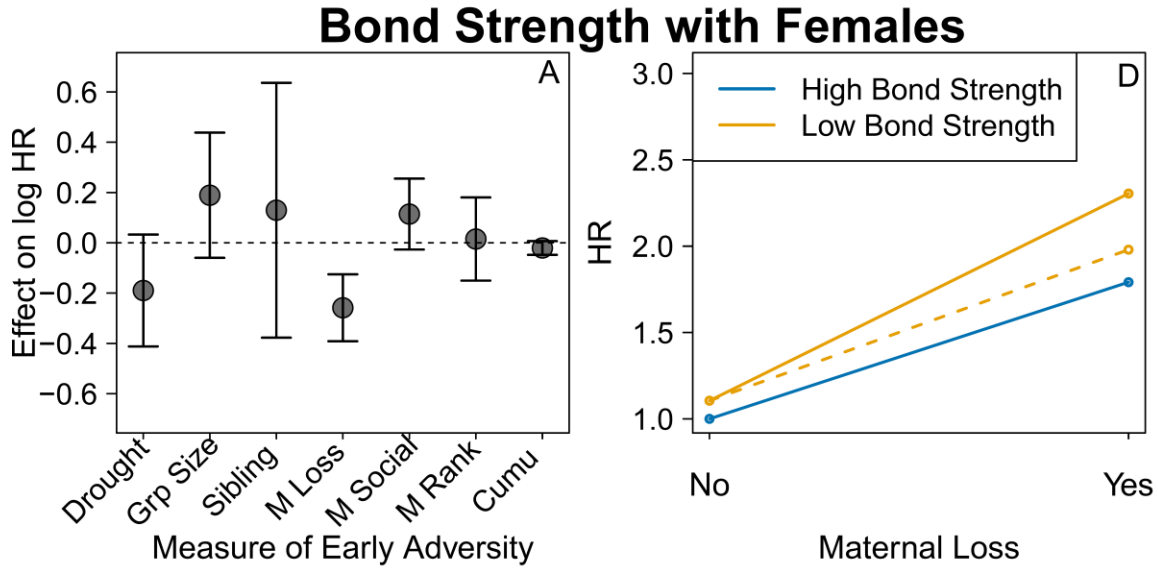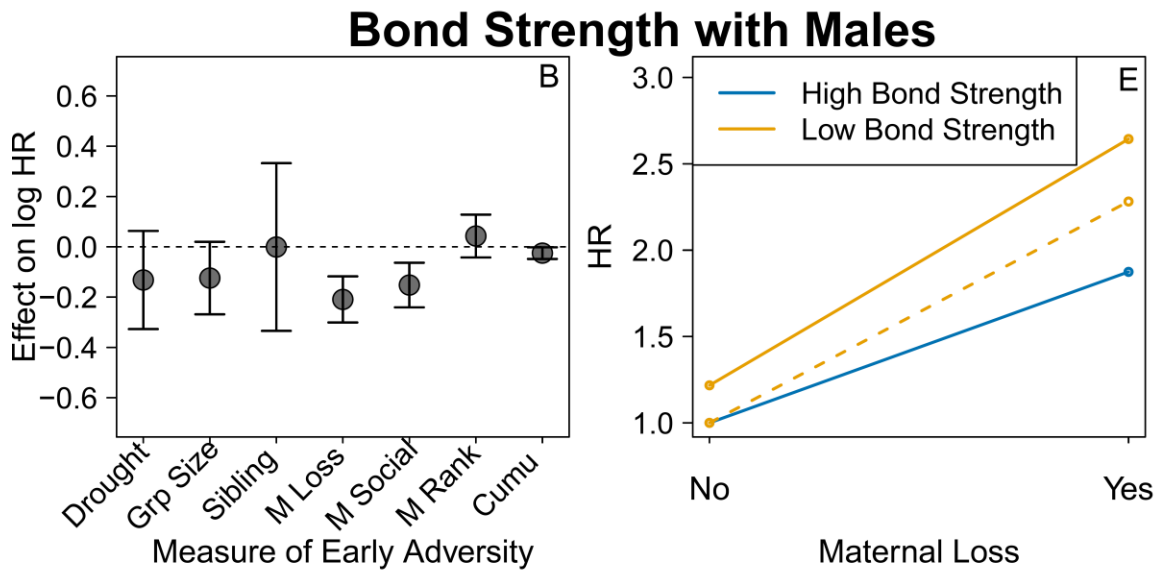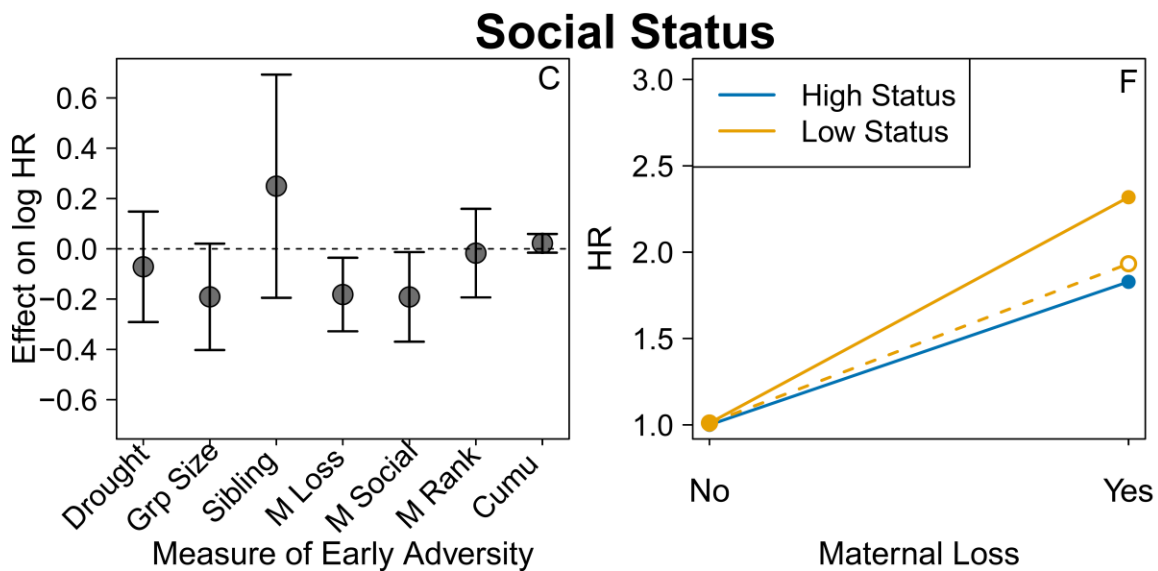

404 **Figure 3.** Moderation models support some forms of social buffering. (A, B, and C) Moderating  
405 effects of (A) social bond strength with females, (B) social bond strength with males, and (C)  
406 social status on the relationship between early adversity and survival (log of the hazard ratio,  
407 HR). A positive value on the y-axis means that greater social bond strength or higher social  
408 status amplify the negative effects of early adversity on survival. Grp Size indicates large social  
409 group size, M Loss indicates maternal loss, M Social indicates low maternal social  
410 connectedness, M Rank indicates low maternal rank, and Cumu indicates cumulative adversity.  
411 Panel A shows that strong social bonds with females buffer the effects of maternal loss; Panel B  
412 shows that strong social bonds with males buffer the effects of both maternal loss and low  
413 maternal social connectedness; Panel C shows that high social status buffers the effects of both  
414 maternal loss and low maternal social connectedness. (D, E, and, F) The effects of (D) social  
415 bond strength with females, (E) social bond strength with males, and (F) social status on the  
416 relationship between maternal loss and survival (measured as the hazard ratio, HR). The orange  
417 dashed line in each panel represents the expected effect of maternal loss on the hazard ratio for  
418 adult females in the absence of any moderating effects of social bonds or status. The blue solid  
419 line shows that females with social bond strength one standard deviation (SD) above the mean  
420 (i.e., females with stronger social bonds) or females with social status one SD above the mean  
421 (i.e., females with high status) experience a disproportionately lower hazard ratio in the presence  
422 of maternal loss. The orange solid line shows that females with social bond strength or social  
423 status one SD below the mean experience a disproportionately higher hazard ratio as a function  
424 of maternal loss.

## 425 Discussion

426 Previous work has debated the relative importance of early adversity and adult social  
427 relationships in determining survival in humans (13, 20-22). Our results shed light on this debate  
428 by providing an example of a wild animal model in which both early life experiences and adult  
429 social relationships are important and act independently on survival, with effects of similar  
430 magnitude. In addition, our moderation analysis indicates that at least for some sources of  
431 adversity, social relationships in adulthood may act as sources of resilience, allowing individuals  
432 to buffer the negative effects of poor early life experiences. Below, we consider several  
433 implications of these results, including the puzzle of weak mediation in spite of significant links  
434 between treatment, putative mediator, and outcome.

435

### 436 *The puzzle of weak mediation*

437 We observed strong effects of both early adversity and adult behavior on survival, and  
438 effects of early adversity on at least one aspect of the adult social environment, with little or no  
439 mediation. One potential explanation for this set of observations is that an assumption of the  
440 mediation analysis was violated, thus producing spurious results. The most likely violated  
441 assumption is that of sequential unconfoundedness: i.e., if an unmeasured confounder in our  
442 system affects both the mediator and survival (47, 48). For example, individuals with better  
443 phenotypic or somatic quality (resulting from either genetic or environmental differences that  
444 were not included in our analysis) may experience both stronger social bonds and better survival,  
445 independent of early adversity. In this case, phenotypic/somatic quality would be an unmeasured  
446 confounder (see discussion of sequential unconfoundedness in 49). To examine the potential for  
447 a confounding variable to affect our analyses, we conducted sensitivity analyses that assess how  
448 the mediated effect estimates vary as a function of the extent of the correlation between an  
449 unmeasured confounding variable and the mediator, and between that same variable and  
450 survival. Our sensitivity analyses demonstrate that our results are relatively robust to the  
451 assumption of sequential unconfoundedness (see Supplementary Text: “Sensitivity analysis for  
452 sequential unconfoundedness”; Figures S5, S6). As a consequence, it is likely that we are  
453 correctly estimating a small mediation size in this study.

454 A second, more likely, explanation is that the effects of early life adversity on social  
455 bonds in adulthood, albeit detectable, are relatively weak. Rosenbaum, Zeng, Campos,  
456 Gesquiere, Altmann, Alberts, Li and Archie (34) found similar results when testing for the  
457 mediating effect of social bonds for the relationship between early adversity and glucocorticoid  
458 levels. If early adversity does not have strong effects on social bond strength, then social bonds  
459 are unlikely to strongly mediate the comparatively quite strong connection between early  
460 adversity and adult survival.

461 In addition, our causal mediation pathway may be shaped by time-varying effects, as  
462 suggested by our simulation model. For example, if early life adversity affects social bonds early  
463 in adulthood, and survival is most strongly affected by social bond strength early in adulthood,  
464 then the matched timing of these effects could give rise to a strong mediating effect of social  
465 bonds. However, if early life adversity affects social bond strength earlier in adulthood, while  
466 survival is most strongly affected by social bond strength later in adulthood, then the mismatched  
467 timing of these effects would minimize the mediation effect. Previous work in birds and humans

468 has shown that such time-varying effects may be a general phenomenon that warrants more  
469 attention (7, 50, 51). For example, in a survey of American adults, Nurius, Fleming and Brindle  
470 (7) show that social relationships in young adulthood are not linked to health, but that older  
471 adults with stronger social connections are in better health. Yang, Boen, Gerken, Li, Schorpp  
472 and Harris (51) also identified variability in the effects of social integration on several health  
473 biomarkers between American adolescents and adults. Exploring time varying effects of early  
474 adversity is therefore an important future avenue of exploration.

475 Two additional explanations are consistent with our observation of independent effects of  
476 social bonds and early adversity, combined with weak mediation. First, social bonds may be one  
477 of a larger set of mediators that all weakly mediate the link between early life environments and  
478 survival. Second, an as-yet unidentified variable could act as a strong mediator of early life  
479 adversity without involving social bonds. For example, the biological embedding hypothesis  
480 predicts that glucocorticoids – produced by the hypothalamic–pituitary–adrenal (HPA) axis and  
481 involved in regulating multiple physiological processes – link early adversity and lifespan (52,  
482 53). In our study population, early life adversity predicts elevated concentrations of  
483 glucocorticoid metabolites in fecal samples in adulthood (34). Furthermore, elevated fecal  
484 glucocorticoid (fGC) concentrations in adulthood are associated with a shortened lifespan (54).  
485 At the same time, social bonds in adulthood are only modestly correlated with fGC  
486 concentrations (34), pointing to fGCs as a possible mediator of early life adversity that bypasses  
487 the pathway through social bonds. Notably, fGC concentrations, like social bonds, appear to  
488 weakly mediate the effects of early life adversity on survival (40), indicating that this pathway  
489 not only represents an alternative to the mediating pathway through social bonds, but also that  
490 multiple mediators may be involved.

491

#### 492 *The evolutionary significance of sources of variance in survival*

493 The independent effects of cumulative early life adversity and social bonds on female  
494 baboon survival are considerable. For each additional source of early adversity, lifespan is  
495 decreased by approximately 1.4 years, independent of social bond strength. Similarly, a one  
496 standard deviation decrease in social bond strength with either sex predicts 2.2 years of  
497 decreased lifespan, independent of early adversity. Notably, lifespan explains >80% of the  
498 variation in lifetime reproductive success (26, 33, 55), and females who experience early life  
499 adversity do not accelerate reproduction to compensate for the reduction in lifespan (33).  
500 Consequently, the combined effects of cumulative early life adversity and adult social isolation  
501 on survival have major consequences for lifetime reproductive success for female baboons.

502 These large effects on fitness indicate that phenotypes that allow individuals to survive in  
503 the face of multiple sources of adversity—which include features of the physical, social, and  
504 maternal environment—are likely to be favored by natural selection (56-58). Features of the  
505 social and maternal environment can be under direct natural selection. For example, our results  
506 suggest that selection should favor low adult mortality in part because maternal mortality directly  
507 decreases offspring survival in adulthood (in addition to other effects, such as the increase in the  
508 number of reproductive opportunities that comes with longer lifespans). In contrast, features of  
509 the physical environment (e.g., drought) cannot be under direct natural selection. However,  
510 adverse physical environments impose natural selection that acts on individual responses to  
511 environmental adversity. Indeed, work in humans has identified many genetic variants that



512 influence the response to environmental stressors (e.g., pathogens, chemical stimuli), and some  
513 of these variants also carry genetic signatures of selection (59, 60). Thus, we expect natural  
514 selection to favor phenotypes that confer resilience to early life adversity even if the resulting  
515 phenotypes have lower fitness than phenotypes produced under advantageous early life  
516 conditions (56-58).

517 Adult social relationships also had strong and independent effects on adult survival,  
518 indicating that adult social behavior is not merely a proxy for the early life environment but is  
519 likely directly targeted by natural selection. Previous work on the links between social bonds and  
520 fitness did not control for early life experience (35, 36), limiting the ability to disentangle direct  
521 and indirect effects of adult behavior on fitness (9, 61). Our results suggest that adult social  
522 behaviors that maintain social bonds should be under strong selection. Further, because social  
523 behavior is almost always partially heritable (e.g., (62-64), these behaviors have the potential to  
524 evolve via natural selection. Further, they suggest that indirect genetic effects, in which the  
525 genotypes of social partners affect behavior, could play an important role in social selection and  
526 evolution (65, 66). Indirect genetic effects are unique because they illustrate that the environment  
527 itself can evolve and as a result create feedback loops that amplify or constrain evolutionary  
528 change, even in the absence of direct selection. However, selection on sociality is also likely to  
529 be limited by tradeoffs (67, 68). For example, tradeoffs may occur between the time allocated to  
530 sociality versus to other activities that are important for maintenance, such as foraging. In  
531 addition, sociality itself imposes costs, including potential increases in pathogen transmission,  
532 intraspecific competition, and social stress. Finally, the mechanisms that link adult social  
533 relationships to survival remain unclear, making it difficult to definitively identify potentially  
534 important targets of selection in addition to social bonds themselves.

535

### 536 *Individual sources of early adversity*

537 We found strong effects of two individual sources of adversity on adult social bond  
538 strength and survival: maternal loss and drought. Consistent with previous findings (26, 33, 34,  
539 40, 69), females whose mothers died when they were young had weaker social bonds with other  
540 females and reduced survival compared to females who did not experience early maternal loss,  
541 although they exhibited no differences in social relationships with males. In nonhuman primates,  
542 maternal loss during the juvenile period compromises the learning of social and foraging skills  
543 (70-73). In our study system in particular, losing a mother early in life is associated with shorter  
544 adult lifespans, weaker adult social bonds with females, compromised patterns of adult rank  
545 acquisition (74), elevated glucocorticoid concentrations in adulthood (34, 39, 40), and relatively  
546 poor survival of offspring (69, 75). Maternal loss also has negative consequences for adult  
547 phenotypes and fitness in other mammal species (27, 75-79) including humans (80, 81).  
548 Therefore, maternal loss during development represents a strong source of early adversity across  
549 taxa, especially in species where mothers are essential for the development of crucial skills.

550 In addition to maternal loss, drought emerges as an important source of early life  
551 adversity in this analysis. Females who experienced drought in their first year of life had weaker  
552 social bonds with both females and males, and also experienced reduced survival relative to  
553 females born in non-drought years via both mediated and direct effects (Tables 2, 3). Drought  
554 threatens food availability which in turn hinders growth and development during the crucial first  
555 year of life (82-86). In addition, individuals born during drought may have fewer opportunities to

556 learn foraging skills during younger years when adults are more tolerant of them during foraging  
557 (72, 87). Consistent with our results, experiencing dry seasons and droughts in early life  
558 negatively affects health in humans (88-93).

559 Notably, two previous analyses in our study system found that drought did not predict  
560 adult survival independently of other sources of early adversity (26, 33). The difference between  
561 the previous studies and this one may be attributable to using somewhat different subsets of the  
562 long-term data, because of different data requirements for each analysis. For instance, the current  
563 analysis includes a larger representation of females who were born during a particularly severe  
564 drought in 2008-2009, a two-year consecutive period in which annual rainfall was less than 200  
565 mm (94). This drought inflicted substantial mortality on wildlife and livestock throughout the  
566 Amboseli ecosystem and surrounding areas (95, 96). Therefore, it represented an extreme  
567 climatic event in the early lives of these individuals which may have driven the strong effects of  
568 drought not detected in previous analyses (26, 33).

569

### 570 *Moderating effects of adult behavior*

571 Our analyses indicate that strong social bonds in adulthood may buffer the negative  
572 consequences of adverse early life events—even for maternal loss, which has far-reaching effects  
573 on phenotypes and fitness. Specifically, we found that female baboons who lost their mothers in  
574 early life but were able to maintain strong social bonds in adulthood survived better than those  
575 who lost their mother and were socially isolated. Therefore, resilient adult phenotypes may  
576 buffer the negative effects of maternal loss. Social buffering has also been suggested as a  
577 mechanism to counteract the negative effects of early life adversity in other mammals (18, 97)  
578 and humans (81). For example, mountain gorillas who lose their mothers tend to strengthen their  
579 social bonds with other group members; perhaps as a consequence, they suffer no detectable  
580 survival costs from maternal loss (97). Social bonds with males may be a particularly important  
581 buffer as, unlike social bonds with females, they are not weakened by maternal loss (34).

### 582 *Conclusions and future directions*

583 By linking prospective data on early life adversity with data on social bonds and survival  
584 in adulthood, we find support for both social causation and health selection. Specifically, by  
585 accounting for the complex relationships between early life, adulthood, and survival, we  
586 confirmed the far-reaching effects of early life adversity – which contributes directly to both  
587 compromised adult social relationships and adult survival – and we also confirmed a direct  
588 influence of adult social relationships on survival. Furthermore, for at least some sources of early  
589 adversity, strong adult social bonds can reduce the negative effects of early life adversity. In  
590 addition to finding support for both social causation and health selection, we argue that responses  
591 to early adversity, sources of early adversity, and adult social behavior are all likely targets of  
592 natural selection. Future work should explore how variation in the timing of early life effects,  
593 and in the timing of the effects of adult phenotypes, affect connections between early adversity,  
594 mediators, and survival in other species. Future work should also examine other potential  
595 mediators (e.g., phenotypic quality, immune response, glucocorticoid levels) of the relationship  
596 between early adversity and lifespan.

597

## 598 **Materials and Methods**

### 599 *Study Subjects*

600 We used longitudinal data on 199 wild adult female baboons (*Papio cynocephalus*, with  
601 some natural admixture from the closely related species *P. anubis* (98, 99) from the Amboseli  
602 ecosystem in Kenya collected between 1983 and 2019. Subjects are habituated to and  
603 individually recognized by experienced observers who collect demographic and behavioral data  
604 6 days a week, year-round, following 1-2 social groups ('study groups') per day. Birth and death  
605 dates for all study subjects are accurate to within a few days' error. Two original study groups  
606 (studied beginning in 1971 and 1980 respectively) experienced multiple permanent fissions and  
607 fusions over the years, resulting in a total of 19 different social groups that persisted for varying  
608 lengths of time. Female baboons remain in their natal social group throughout their lives (except  
609 for group fissions or fusions), and thus any disappearance of a female in our dataset was  
610 considered a death. Of the 199 females in the study, 74 had died by the end of the study and the  
611 rest were considered censored in survival analyses. To be included in the study, females had to  
612 meet the following criteria: (i) they survived to at least 4 years of age (most females reach  
613 menarche between 4 and 5 years of age; (100), (ii) they had available data on exposure to all six  
614 sources of early adversity in the infant and juvenile period, and (iii) they were members of study  
615 groups that foraged entirely on naturally occurring foods (26, 33, 34).

616

### 617 *Measuring Early Life Adversity*

618 We created an index of cumulative early life adversity by considering six conditions that  
619 represent socioenvironmental adversity experienced during the first four years of life: drought in  
620 the first year of life, large group size at birth, low maternal social status at birth, low maternal  
621 social connectedness in the first two years of life, a close-in-age younger sibling, and maternal  
622 loss before age four (Table 1; 26, 33). Drought years were those in which less than 200 mm of  
623 rain fell. Large group sizes were considered as those in the highest quartile of the group size  
624 (number of adults) distribution. Low maternal social status was assigned when the mother's  
625 proportional dominance rank in the month of her offspring's birth was in the lowest quartile of  
626 dominance ranks. Proportional dominance rank ranges from 0 (lowest ranking female) to 1  
627 (highest ranking female) and indicates the proportion of adult females in a study subject's social  
628 group that she dominated in agonistic interactions (46). Low maternal social connectedness was  
629 assigned when the mother's social connectedness to other females was in the lowest quartile of  
630 the distribution of social connectedness values during our study subjects' first two years of life.  
631 Following previous work on early life adversity in this population (26, 33), social connectedness  
632 was measured as the relative frequency of the mother's grooming interactions with other adult  
633 females in her social group, adjusted for observer effort (see 'Measuring social bond strength'  
634 for information about observer effort). Close-in-age younger siblings were those born within 1.5  
635 years of the subject's birth, approximately the shortest quartile of observed interbirth intervals in  
636 the Amboseli baboons (26). A subject was considered to experience maternal loss if her mother  
637 died within her first four years of life (i.e., before the earliest age of sexual maturation for  
638 females in this population).

639 Each subject's cumulative adversity index was calculated as the sum of exposures to  
640 these six sources of adversity. In our dataset, 48 females experienced zero sources of adversity,

641 84 experienced one, 50 experienced two, 14 experienced three, 3 experienced four, and none  
642 experienced five or six.

643

#### 644 *Measuring Social Bond Strength*

645 We measured an adult female's social relationships by assessing the strength of social  
646 bonds with her top three male or female social partners separately, in each year of her life,  
647 measured relative to the social bonds of all other females in the population with males or females  
648 respectively, as described in Rosenbaum, Zeng, Campos, Gesquiere, Altmann, Alberts, Li and  
649 Archie (34). Briefly, grooming interactions are recorded during all hours of observation, using  
650 representative interaction sampling in which observers record all the interactions they see while  
651 conducting 10-minute focal follows on a randomized set of individuals. We calculated the  
652 number of grooming interactions with each partner per day of co-residence in the same group  
653 from these representative interaction data for each year of life for each female subject starting on  
654 her birthday. Calculating interaction rates from such data is complicated by the fact that the  
655 number of observers remains constant over time, while social group sizes vary, so that higher  
656 numbers of grooming interactions per pair of animals (per dyad) will generally be observed in  
657 smaller groups compared to larger groups. We corrected for this variation in observer effort by  
658 regressing daily rates of grooming interactions per dyad against observer effort, where observer  
659 effort was calculated as the number of focal samples on adult females collected during each  
660 observer day, divided by the mean number of adult females in the group during those days,  
661 divided by the number of days that each dyad was co-resident (34, 36). We z-scored the  
662 corrected rates within years to control for temporal variation in sociality in the population.

663 Each subject's social bond strength with females and with males was taken as the average  
664 of the subject's three strongest adult female grooming partners and adult male grooming  
665 partners, respectively, to calculate a dyadic sociality index (DSI). A positive value for social  
666 bond strength indicates a female had relatively strong social bonds with her top three partners  
667 compared to the population average. A negative value for social isolation means the subject had  
668 relatively weak social bonds with her top three partners.

669

#### 670 *Random Effects and Covariates*

671 Previous work has demonstrated that several environmental and demographic variables  
672 not discussed above (i.e., presence of maternal relatives, group size, social status, percent of prior  
673 year with young infant, percent of prior year cycling, rainfall) explain variation in social bond  
674 strength and/or survival (34-36, 42). To control for these effects, we included them as covariates  
675 in our mediation and moderation analyses (for details see Supplementary Information). We also  
676 included social group and hydrological year as random effects in all models to control for group-  
677 to-group and interannual variation (34). Age was not included as a covariate even though social  
678 bonds vary with age, because age effects are captured by our functional principal components  
679 analysis (FPCA) approach to modeling the mediator (see below). Because our baboon study  
680 population represents an admixed population (yellow baboon ancestry is dominant, but all  
681 individuals exhibit some degree of admixture with anubis baboons), we also ran separate  
682 analyses that included a covariate measure of individual admixture, a 'genetic hybrid score' that

683 represents the proportion of each individual's genome estimated to be from *P. anubis* ancestry  
684 (see Supplementary Information, also (101, 102). Results that incorporated hybrid score (Tables  
685 S4-S5) were similar to those of the full model (Tables 2-3).

686 In preliminary analyses we considered social status as a third potential mediator of the  
687 effects of early adversity on survival. However, as previously reported (35, 36), we found no  
688 effects of social status (again measured as proportional dominance rank) on female survival  
689 (Table S6). In addition, we found no effect of cumulative early adversity on female social status,  
690 and no mediating effects of female social status on the relationship between early life adversity  
691 and survival (Tables S6). As a consequence, we focus on social bond strength as the primary  
692 mediating variable in the main text, but report models for social status as a mediator in the  
693 Supplementary Materials.

694 One individual source of early adversity strongly predicted proportional dominance rank:  
695 low maternal dominance rank predicted low proportional rank for the study subject in adulthood  
696 (Table S6), which is unsurprising as rank is matrilineally inherited in this species (103). In light  
697 of this relationship, we controlled for proportional rank by including it as a covariate when  
698 estimating the effect of early life adversity on the mediator.

699

#### 700 *Mediation Analysis Implementation*

701 We fit two models in each of our mediation analyses (40). The first model captures the  
702 relationship between early adversity and the mediator. The second model characterizes the  
703 relationship between early adversity, the mediator, and survival. Models were implemented using  
704 the R packages *survival* and *flexsurv*. The reproducible code is available at  
705 [[https://github.com/zengshx777/MFPCA\\_Codebase](https://github.com/zengshx777/MFPCA_Codebase)].

706 *The first model: the relationship between early adversity and the mediator.* Our first  
707 model applies to the observed mediator trajectory  $M_{ij}$  and the measure of early adversity  $A_i$ ,  
708 where  $i$  indexes individual and  $j$  indexes time. This model corresponds to the Equation 1 in the  
709 main text. Because the observed mediator values are noisy and potentially measured imprecisely,  
710 we consider them, after adjusting for covariates and random effects, as realizations of an  
711 underlying smooth process ( $M_i(t_{ij})$ ) with a random noise. Specifically, we modeled the  
712 trajectory of the mediator  $M_{ij}$  as a combination of covariate effects  $C_{ij}\beta_m$ , social group random  
713 effects  $r_{social\ group}^m$ , hydrological year random effects  $r_{hydro}^m$ , an underlying smooth process  
714  $M_i(t_{ij})$ , and an error term  $\varepsilon_{ij}$ ,

$$M_{ij} = C_{ij}^m \beta_m + r_{social\ group}^m + r_{hydro}^m M_i(t_{ij}) + \varepsilon_{ij}, \varepsilon_{ij} \sim N(0, \sigma_m^2) \quad (5)$$

715 Because  $M_i(t_{ij})$  is of infinite dimension mathematically, we performed dimension reduction to  
716 improve the statistical power of our analysis. Specifically, we used a functional principal  
717 component analysis (FPCA) method to decompose the smooth process as the linear combination  
718 of the fewest possible functional principal components (39, 40, 104-106). We began by  
719 examining the correlation between any two time points in the mediator process (e.g., between the  
720 value of the mediator at age 4 and age 8, between the value of the mediator at age 4 and age 9,  
721 and so on) to produce a correlation structure between mediator values at different time points,  
722 which we then expressed as principal components or eigen functions,



$$Cov(M_i(t_1), M_i(t_2)) = \sum_{k=1}^{\infty} \lambda_k \psi_k(t_1) \psi_k(t_2), \lambda_1 \geq \lambda_2 \geq \dots \geq 0 \quad (6)$$

723 where  $\lambda_k$  is the explained variance of the orthogonal normal principal components  $\psi_k(t)$ . We  
 724 ordered the principal components by the amount of variance they explained to reflect the fact  
 725 that principal components that explain more variance (larger  $\lambda_k$ ) are more important in  
 726 expressing the smooth process. We then used the first  $K$  principal components, where  $K$  is the  
 727 number of components necessary to collectively explain at least 90% of the variance  
 728 ( $\sum_{k=1}^K \lambda_k / \sum_{k=1}^{\infty} \lambda_k \geq 90\%$ ).

729 In the next step, we represent the smooth process of each subject's mediator process as a  
 730 linear combination of the  $K$  principal components,

$$M_i(t) = \sum_{k=1}^K \xi_{ik} \psi_k(t) \quad (7)$$

731 where  $\xi_{ik}$  is the principal score for individual  $i$  on the  $k$ th principal component or eigen function.  
 732 The variance of  $\xi_{ik}$  corresponds to the explained variance of principal component,  $\lambda_k$ . We can  
 733 efficiently express the smooth process and trajectory with a small number of principal  
 734 components ( $K$  is never greater than 4 in our work), capturing the major variation. Therefore,  
 735 coupled with the FPCA, we posit the following model of the mediator,

$$M_{ij} = C_{ij} \beta_m + r_{cluster}^m + r_{hydro}^m + \sum_{k=1}^K \xi_{ik} \psi_k(t) + \varepsilon_{ij}, \varepsilon_{ij} \sim N(0, \sigma_m^2) \quad (8)$$

736 which corresponds to Equation 1 in the main text. Furthermore, we assume that the differences in  
 737 trajectories caused by early adversity are captured by the differences in the principal scores.  
 738 Therefore, we use the following specification for the principal scores, with different means for  
 739 each level of adversity in the cumulative model or with different means for the group that  
 740 experienced each early adversity and for the group did not experience early adversity in the  
 741 models of individual sources of adversity,

$$\xi_{ik} = A_i(\tau_1^k - \tau_0^k) + \tau_0^k + \eta_{ik}, \eta_{ik} \sim N(0, \lambda_k), \lambda_1 \geq \lambda_2 \geq \dots \lambda_K \geq 0 \quad (9)$$

742 where  $\tau_1^k$  denotes the mean of the  $k^{\text{th}}$  principal score for the subjects in the adversity group while  
 743  $\tau_0^k$  represents that for the non-adversity group (for cumulative adversity,  $\tau_1^k$  denotes the  $k^{\text{th}}$   
 744 principal score for a higher level of adversity relative to  $\tau_0^k$ , the score for one level lower) We fit  
 745 Equation 8 simultaneously with Equation 9. Hence, instead of estimating the effect of adversity  
 746 on the trajectories directly, which is a high dimensional problem, we estimate its effect on the  
 747 first  $K$  principal scores  $\xi_{i1}, \xi_{i2}, \dots, \xi_{iK}$ .

748 The effect of early adversity parameterized with different means for the principal scores  
 749 is not directly interpretable. Therefore, we estimated the effect of early adversity on the mediator  
 750 as the difference in the mean of the trajectories for the adversity group versus the non-adversity  
 751 groups (for the cumulative adversity measure it was the difference in means comparing two  
 752 adjacent levels of adversity, e.g., for a cumulative score of 3 versus 2). Based on Equations 8 and  
 753 9, we can express the conditional expectation of the mediator process  $M_{ij}$  at time point  $t_{ij}$  as

754 follows,

$$E(M_{ij}|C_{ij}, A_i) = \beta_m C_{ij} + \sum_{k=1}^K (A_i(\tau_1^k - \tau_0^k) + \tau_0^k) \psi_k(t_{ij}), \quad (10)$$

755 which corresponds to Equation 1 in the main text. Next, we express the effect of early adversity  
756 on social isolation using:

$$b_1(t) = \sum_{k=1}^K (\tau_1^k - \tau_0^k) \psi_k(t) \quad (11)$$

757 The effect on the mediator is also time-indexed, because we are estimating the effect of  
758 adversity on the mediator trajectory across the lifespan. Integrating  $b_1(t)$  over time gives an  
759 estimation of parameter  $\beta_1$  (the beta coefficient associated with the effect on the mediator) in  
760 Equation 1 in the main text:

$$\beta_1: \frac{1}{T} \int_0^T b_1(t) dt \quad (12)$$

761

762 *The second model: the relationship between early adversity, the mediator, and survival.* Our  
763 second model estimated the survival outcomes. We adopted a Cox model for the hazard rate  
764  $\lambda(t)$ . Specifically, we employed the following model,

$$765 \lambda(t|C_{it}, A_i, M_i(t)) = \lambda_0(t) \exp(\widetilde{\beta}_3 A_i + f\{\alpha, M_i(t)\} + \theta_3 C_{it}^S + r_{cluster}^y + r_{hydro}^y) \quad (13)$$

766 where (i)  $f\{\alpha, M_i(t)\}$  is the function of the mediator process up to time point  $t$  with parameter  $\alpha$   
767 characterizing the effect of the mediator process on the hazard rate, and  $M_i(t)$  is replaced by its  
768 estimated value  $\widehat{M}_i(t_{ij})$  from Equation 8, and (ii)  $\lambda_0(t)$  is the baseline hazard rate, which we  
769 specify as following a Gompertz distribution (107, 108),

$$770 \lambda_0(t) = a \exp(bt). \quad (14)$$

771 We consider two specifications of  $f$  in our case: (i) a model using estimated trajectories of three-  
772 year mediator values that assumes the hazard rate depends on the mediator history in the  
773 previous three years,  $f\{\alpha, M_i(t)\} = \int_0^t \alpha(s) M_i(s) ds$ , and (ii) a model using estimated  
774 trajectories of one-year mediator values that assumes the hazard rate depends on the current  
775 mediator value assessed in the year in which survival is assessed,  $f\{\alpha, M_i(t)\} = \alpha M_i(t)$ . For the  
776 three-year model, we specify  $\alpha(t)$  as a linear combination of the spline basis  $\alpha(t) =$   
777  $s(t)' \rho$ ,  $s(t) = [1, t, (t - k_1)^2, (t - k_2)^2, \dots, (t - k_L)^2]$  (106), which allows a flexible modeling  
778 of how the past mediator affects the survival.

779 Following the notation in the causal mediation analysis literature (109, 110), let  $S_{z,z'}(t)$   
780 denote the survival function when the subject's early adversity status is  $z$  and the mediator  
781 trajectory counterfactually takes the value as if the subject has early adversity status  $z'$ . The  
782 adversity status  $z$  can be ordinal (for cumulative adversities) or binary ( $z=0$  for the non-adversity  
783 group and  $z=1$  for the adversity group mediator to estimate the total, direct, and mediated

784 effects). For example, if  $z=0$  and  $z'=1$ , then  $S_{z,z'}(t)$  is the survival function for baboons who did  
 785 not experience early adversity, but whose mediator values are counterfactually calculated as if  
 786 they did experience early adversity. This strategy is standard in causal mediation research; it  
 787 allows us to decompose the total effect into the mediated effect and the indirect effect (40, 110-  
 788 112). Based on the model for hazard rate, we can calculate the  $S_{z,z'}(t)$  up to time  $t$  by  
 789 integrating the hazard function. Specifically, it takes the following form,

$$790 \quad S_{z,z'}(t) = \exp(-\Lambda_{z,z'}(t)) \quad (15)$$

$$791 \quad \Lambda_{z,z'}(t) = \frac{1}{N} \sum_i^N \sum_j^T \lambda_0(t_{ij}) \exp(\alpha z + \theta_3 C'_{ij} + f\{\alpha, C'_{ij} \beta_m + \sum_{k=1}^K \tau_{z'}^k \psi_k(t_{ij})\} s)(t_{ij} - \quad (16)$$

$$792 \quad t_{ij-1})$$

793

794 where  $\Lambda_{z,z'}(t)$  is the cumulative hazard function. Once we obtain  $S_{z,z'}(t)$ , we can calculate the  
 795 total effect, direct effect, and mediated effect on the scale of years,

$$796 \quad \text{total effect} = \beta_2 = \int_0^T \{S_{1,1}(u) - S_{0,0}(u)\} du, \quad (17a)$$

$$797 \quad \text{direct effect} = \beta_3 = \int_0^T \{S_{1,0}(u) - S_{0,0}(u)\} du, \quad (17b)$$

$$798 \quad \text{mediated effect} = \beta_1 \gamma = \int_0^T \{S_{1,1}(u) - S_{1,0}(u)\} du. \quad (17c)$$

799 To estimate the effect of the mediator on survival (while controlling for the effects of  
 800 early adversity on the mediator), we followed similar steps. We calculated the mediator  
 801 trajectory for a one unit change in social bond strength while fixing the value of early adversity  
 802 exposure to one (a value that corresponds to experiencing at least one source of adversity in the  
 803 cumulative adversity model or to experiencing adversity in the models for each individual source  
 804 of adversity). This approach allows us to estimate the consequences of the unit change in the  
 805 mediator, irrespective of the underlying reason why it might change (i.e., whether due to the  
 806 effects of early adversity or some other reason), because it controls for the effects of early  
 807 adversity that act independently of the mediator. Thus, the isolation effect describes how one unit  
 808 change in social bond strength affects survival in years, where a one unit change represents  
 809 approximately 1.7 SD for social bond strength with females and 1.4 SD for social bond strength  
 810 with males; 1 SD in social bond strength with females=0.59 social bond strength units, 1 SD in  
 811 social bond strength with males=0.70 units.

812

### 813 Causal Assumptions

814 To interpret the above models as causal, three assumptions are required. The first is the  
 815 assumption of unconfoundedness. In our case, we assume that early adversity is randomly  
 816 assigned to the subjects in the study. It also assumes that no unmeasured confounding variables  
 817 cause variation in both early adversity and the mediator or cause variation in both early adversity  
 818 and survival time, a result that follows if exposure to early adversity is largely determined by

819 natural events that are independent of the subject's individual traits, which is most likely true in  
820 our case.

821 The second is the assumption of sequential unconfoundedness, which states that no  
822 unmeasured confounding variables cause variation in both the mediator and survival, besides  
823 the observed covariates  $C$  and the past history of the mediator  $M$  (47, 48, 113). This assumption  
824 will be violated if an unmeasured variable (for instance, phenotypic or somatic quality, resulting  
825 from either genetic or environmental differences that were not included in our analysis) enhances  
826 or reduces both the mediator and survival.

827 We controlled for confounders as much as possible by including covariates when  
828 modeling the mediators and survival, but the sequential unconfoundedness assumption is  
829 essentially untestable because it invokes the possibility of an unknown and therefore unidentified  
830 covariate (49). To estimate the potential effect of one or more unidentified covariates, we  
831 performed a sensitivity analysis (for details see Supplementary Text: "Sensitivity analysis for  
832 sequential unconfoundedness"). Specifically, we assumed the existence of an unmeasured  
833 confounder between the mediator and survival that violates the sequential unconfoundedness  
834 assumption (114, 115). In our simulation, the correlation between the unmeasured confounder  
835 and the mediator or outcome quantifies the degree of violation of the assumption. For a set of  
836 prespecified correlation values, we repeated the mediation analysis and examined the sensitivity  
837 of the results to the degree of violation of the sequential unconfoundedness assumption. We  
838 found that under various degrees of violation of the assumption, the mediated effect was not  
839 significant (Figures S5, S6). Therefore, our conclusions are robust to the untestable assumption.  
840 Details of the sensitivity analysis can be found in the supplement and Zeng, Lange, Archie,  
841 Campos, Alberts and Li (40).

842 The third assumption we impose is independent censoring, i.e., we assume that the time  
843 at which a subject drops out of the study prior to death is random with respect to characteristics  
844 of the subject or its experience of early adversity. This assumption is likely to hold in our study  
845 because female baboons are censored in only two circumstances in our study: either they  
846 survived to the end of the period of data collection, or the social group in which they lived was  
847 dropped for logistical reasons.

848

#### 849 *Moderation Analysis Implementation*

850 For the moderation analysis, we modified Equation 13 by incorporating an interaction  
851 term between  $A$  and  $M$  in the hazard function for survival, as follows:

$$852 \quad \lambda(t|C_{it}^S, A_i, M_{it}) = \lambda_0(t) \exp(\xi A_i + f\{\alpha, M_i(t)\} + A_i g\{\eta, M_i(t)\} + \theta_3 C_{it}^S + r_{group}^S + r_{hyrdo}^S). \quad (18)$$

853 Adding this interaction term,  $A_i g\{\eta, M_i(t)\}$ , in the hazard function allows us to test for the  
854 interaction between early adversity and social behavior predicted by the social buffering  
855 hypothesis. Therefore, this approach allows us to estimate how the effects of early adversity on  
856 survival vary across different levels of the moderator. Similar to the survival model in the  
857 mediation analysis, we imposed two specifications for the interaction term  $A_i g\{\eta, M_i(t)\}$ : (i) a  
858 three-year model  $g\{\eta, M_i(t)\} = \int_0^t \eta(s) M_i(s) ds$ , and (ii) a one-year model,  $g\{\eta, M_i(t)\} = \eta M_{it}$ .  
859 For the three-year model, we use  $\int_0^T \eta(s) ds$  as the summary for the moderation effect. When

860  $\eta < 0$ , the model indicates that a higher value for the moderator buffers the negative effects of  
861 early adversity. When  $\eta > 0$ , the model implies that the moderator amplifies these negative  
862 effects.

863



864 **References**

- 865 1. H. Jia, E. I. Lubetkin, Impact of adverse childhood experiences on quality-adjusted life  
866 expectancy in the US population. *Child Abuse & Neglect* **102**, 104418 (2020).
- 867 2. V. J. Felitti *et al.*, Relationship of childhood abuse and household dysfunction to many of  
868 the leading causes of death in adults: The adverse childhood experiences (ACE) study.  
869 *American journal of preventive medicine* **14**, 245-258 (1998).
- 870 3. K. Petruccelli, J. Davis, T. Berman, Adverse childhood experiences and associated health  
871 outcomes: A systematic review and meta-analysis. *Child abuse & neglect* **97**, 104127  
872 (2019).
- 873 4. G. E. Miller *et al.*, Low early-life social class leaves a biological residue manifested by  
874 decreased glucocorticoid and increased proinflammatory signaling. *Proceedings of the  
875 National Academy of Sciences* **106**, 14716-14721 (2009).
- 876 5. A. E. Berens, S. K. Jensen, C. A. Nelson, Biological embedding of childhood adversity:  
877 from physiological mechanisms to clinical implications. *BMC medicine* **15**, 1-12 (2017).
- 878 6. A. M. Ebbert, F. J. Infurna, S. S. Luthar, K. Lemery-Chalfant, W. R. Corbin, Examining  
879 the link between emotional childhood abuse and social relationships in midlife: The  
880 moderating role of the oxytocin receptor gene. *Child Abuse & Neglect* **98**, 104151 (2019).
- 881 7. P. S. Nurius, C. M. Fleming, E. Brindle, Life course pathways from adverse childhood  
882 experiences to adult physical health: A structural equation model. *Journal of Aging and  
883 Health* **31**, 211-230 (2019).
- 884 8. M. D. Hayward, B. K. Gorman, The long arm of childhood: The influence of early-life  
885 social conditions on men's mortality. *Demography* **41**, 87-107 (2004).
- 886 9. N. Snyder-Mackler *et al.*, Social determinants of health and survival in humans and other  
887 animals. *Science* **368**, (2020).
- 888 10. M. G. Marmot *et al.*, Health inequalities among British civil servants: the Whitehall II  
889 study. *The Lancet* **337**, 1387-1393 (1991).
- 890 11. R. Chetty *et al.*, The association between income and life expectancy in the United States,  
891 2001-2014. *Jama* **315**, 1750-1766 (2016).
- 892 12. J. Holt-Lunstad, T. B. Smith, M. Baker, T. Harris, D. Stephenson, Loneliness and social  
893 isolation as risk factors for mortality: a meta-analytic review. *Perspectives on  
894 psychological science* **10**, 227-237 (2015).
- 895 13. H. Kröger, E. Pakpahan, R. Hoffmann, What causes health inequality? A systematic  
896 review on the relative importance of social causation and health selection. *The European  
897 Journal of Public Health* **25**, 951-960 (2015).
- 898 14. J. R. Warren, Socioeconomic status and health across the life course: a test of the social  
899 causation and health selection hypotheses. *Social forces* **87**, 2125-2153 (2009).
- 900 15. A. Case, C. Paxson, The long reach of childhood health and circumstance: evidence from  
901 the Whitehall II Study. *The Economic Journal* **121**, F183-F204 (2011).
- 902 16. T. Chandola, M. Bartley, A. Sacker, C. Jenkinson, M. Marmot, Health selection in the  
903 Whitehall II study, UK. *Social science & medicine* **56**, 2059-2072 (2003).
- 904 17. T. Kikusui, J. T. Winslow, Y. Mori, Social buffering: relief from stress and anxiety.  
905 *Philosophical Transactions of the Royal Society B: Biological Sciences* **361**, 2215-2228  
906 (2006).
- 907 18. M. B. Hennessy, S. Kaiser, N. Sachser, Social buffering of the stress response: diversity,  
908 mechanisms, and functions. *Frontiers in neuroendocrinology* **30**, 470-482 (2009).

- 909 19. S. Cohen, T. A. Wills, Stress, social support, and the buffering hypothesis. *Psychological*  
910 *bulletin* **98**, 310 (1985).
- 911 20. Ø. Næss, B. Claussen, G. D. Smith, Relative impact of childhood and adulthood  
912 socioeconomic conditions on cause specific mortality in men. *Journal of Epidemiology &*  
913 *Community Health* **58**, 597-598 (2004).
- 914 21. M. Elovainio *et al.*, Socioeconomic differences in cardiometabolic factors: social  
915 causation or health-related selection? Evidence from the Whitehall II Cohort Study,  
916 1991–2004. *American journal of epidemiology* **174**, 779-789 (2011).
- 917 22. R. Hoffmann, H. Kröger, S. Geyer, Social causation versus health selection in the life  
918 course: Does their relative importance differ by dimension of SES? *Social indicators*  
919 *research* **141**, 1341-1367 (2019).
- 920 23. H. F. Wu, Social determination, health selection or indirect selection? Examining the  
921 causal directions between socioeconomic status and obesity in the Chinese adult  
922 population. *Social Science & Medicine* **269**, 113564 (2021).
- 923 24. A. Gugushvili, G. Bulczak, O. Zelinska, J. Koltai, Socioeconomic position, social  
924 mobility, and health selection effects on allostatic load in the United States. *PloS one* **16**,  
925 e0254414 (2021).
- 926 25. G. W. Evans, D. Li, S. S. Whipple, Cumulative risk and child development.  
927 *Psychological bulletin* **139**, 1342 (2013).
- 928 26. J. Tung, E. A. Archie, J. Altmann, S. C. Alberts, Cumulative early life adversity predicts  
929 longevity in wild baboons. *Nature Communications* **7**, 11181 (2016).
- 930 27. S. Z. Goldenberg, G. Wittemyer, Orphaned female elephant social bonds reflect lack of  
931 access to mature adults. *Scientific Reports* **7**, 14408 (2017).
- 932 28. A. M. Dettmer *et al.*, Associations between early life experience, chronic HPA axis  
933 activity, and adult social rank in rhesus monkeys. *Social neuroscience* **12**, 92-101 (2017).
- 934 29. S. K. Patterson, S. C. Strum, J. B. Silk, Early life adversity has long-term effects on  
935 sociality and interaction style in female baboons. *Proceedings of the Royal Society B* **289**,  
936 20212244 (2022).
- 937 30. S. C. Alberts, Social influences on survival and reproduction: Insights from a long-term  
938 study of wild baboons. *Journal of Animal Ecology* **88**, 47-66 (2019).
- 939 31. S. C. Alberts, J. Altmann, in *Long-term field studies of primates*. (Springer, 2012), pp.  
940 261-287.
- 941 32. S. C. Alberts, J. Altmann, Balancing costs and opportunities: dispersal in male baboons.  
942 *The American Naturalist* **145**, 279-306 (1995).
- 943 33. C. J. Weibel, J. Tung, S. C. Alberts, E. A. Archie, Accelerated reproduction is not an  
944 adaptive response to early-life adversity in wild baboons. *Proceedings of the National*  
945 *Academy of Sciences*, (2020).
- 946 34. S. Rosenbaum *et al.*, Social bonds do not mediate the relationship between early  
947 adversity and adult glucocorticoids in wild baboons. *Proceedings of the National*  
948 *Academy of Sciences* **117**, 20052-20062 (2020).
- 949 35. E. A. Archie, J. Tung, M. Clark, J. Altmann, S. C. Alberts, Social affiliation matters: both  
950 same-sex and opposite-sex relationships predict survival in wild female baboons.  
951 *Proceedings of the Royal Society B: Biological Sciences* **281**, 20141261 (2014).
- 952 36. F. A. Campos, F. Villavicencio, E. A. Archie, F. Colchero, S. C. Alberts, Social bonds,  
953 social status and survival in wild baboons: a tale of two sexes. *Philosophical*  
954 *Transactions of the Royal Society B: Biological Sciences* **375**, 20190621 (2020).

- 955 37. R. M. Baron, D. A. Kenny, The moderator–mediator variable distinction in social  
956 psychological research: Conceptual, strategic, and statistical considerations. *Journal of*  
957 *personality and social psychology* **51**, 1173 (1986).
- 958 38. T. J. VanderWeele, Mediation analysis: a practitioner's guide. *Annual review of public*  
959 *health* **37**, 17-32 (2016).
- 960 39. S. Zeng, E. Archie, S. C. Alberts, F. Li, Causal mediation analysis for sparse and  
961 irregular longitudinal data. *Annals of Applied Statistics* **15**, 747-767 (2021).
- 962 40. S. Zeng *et al.*, A causal mediation model for longitudinal mediators and survival  
963 outcomes with an application to animal behavior. *Journal of Agricultural, Biological, and*  
964 *Environmental Statistics*, 1-22 (2022).
- 965 41. J. B. Silk *et al.*, Female chacma baboons form strong, equitable, and enduring social  
966 bonds. *Behavioral Ecology and Sociobiology* **64**, 1733-1747 (2010).
- 967 42. J. B. Silk, J. Altmann, S. C. Alberts, Social relationships among adult female baboons  
968 (*Papio cynocephalus*) I. Variation in the strength of social bonds. *Behavioral Ecology and*  
969 *Sociobiology* **61**, 183-195 (2006).
- 970 43. J. C. Mitani, Male chimpanzees form enduring and equitable social bonds. *Animal*  
971 *Behaviour* **77**, 633-640 (2009).
- 972 44. A. J. King, F. E. Clark, G. Cowlshaw, The dining etiquette of desert baboons: the roles  
973 of social bonds, kinship, and dominance in co-feeding networks. *American Journal of*  
974 *Primatology* **73**, 768-774 (2011).
- 975 45. G. Hausfater, University of Chicago, (1974).
- 976 46. E. J. Levy *et al.*, Comparing proportional and ordinal dominance ranks reveals multiple  
977 competitive landscapes in an animal society. *Proceedings of the Royal Society B*, (2020).
- 978 47. L. Forastiere, A. Mattei, P. Ding, Principal ignorability in mediation analysis: through  
979 and beyond sequential ignorability. *Biometrika* **105**, 979-986 (2018).
- 980 48. K. Imai, L. Keele, T. Yamamoto, Identification, inference and sensitivity analysis for  
981 causal mediation effects. *Statistical science* **25**, 51-71 (2010).
- 982 49. A. Acharya, M. Blackwell, M. Sen, Explaining causal findings without bias: Detecting  
983 and assessing direct effects. *American Political Science Review* **110**, 512-529 (2016).
- 984 50. F. Spagopoulou *et al.*, Silver-spoon upbringing improves early-life fitness but promotes  
985 reproductive ageing in a wild bird. *Ecology Letters* **23**, 994-1002 (2020).
- 986 51. Y. C. Yang *et al.*, Social relationships and physiological determinants of longevity across  
987 the human life span. *Proceedings of the National Academy of Sciences* **113**, 578-583  
988 (2016).
- 989 52. C. Hertzman, T. Boyce, How Experience Gets Under the Skin to Create Gradients in  
990 Developmental Health. *Annual Review of Public Health* **31**, 329-347 (2010).
- 991 53. G. E. Miller, E. Chen, K. J. Parker, Psychological stress in childhood and susceptibility to  
992 the chronic diseases of aging: moving toward a model of behavioral and biological  
993 mechanisms. *Psychological bulletin* **137**, 959 (2011).
- 994 54. F. A. Campos *et al.*, Glucocorticoid exposure predicts survival in female baboons.  
995 *Science Advances* **7**, eabf6759 (2021).
- 996 55. E. M. McLean, E. A. Archie, S. C. Alberts, Lifetime Fitness in Wild Female Baboons:  
997 Trade-Offs and Individual Heterogeneity in Quality. *The American Naturalist* **194**, 745-  
998 759 (2019).
- 999 56. A. J. Lea, S. Rosebaum, Understanding how early life effects evolve: progress, gaps, and  
1000 future directions. *Current Opinion in Behavioral Sciences* **36**, 29-35 (2020).

- 1001 57. A. J. Lea, J. Tung, E. A. Archie, S. C. Alberts, Developmental plasticity: bridging  
1002 research in evolution and human health. *Evolution, medicine, and public health* **2017**,  
1003 162-175 (2017).
- 1004 58. J. Lindström, Early development and fitness in birds and mammals. *Trends in Ecology &*  
1005 *Evolution* **14**, 343-348 (1999).
- 1006 59. A. J. Lea, J. Peng, J. F. Ayroles, Diverse environmental perturbations reveal the evolution  
1007 and context-dependency of genetic effects on gene expression levels. *bioRxiv*,  
1008 2021.2011.2004.467311 (2022).
- 1009 60. Y. Nédélec *et al.*, Genetic Ancestry and Natural Selection Drive Population Differences  
1010 in Immune Responses to Pathogens. *Cell* **167**, 657-669.e621 (2016).
- 1011 61. N. A. Thompson, Understanding the links between social ties and fitness over the life  
1012 cycle in primates. *Behaviour* **156**, 859-908 (2019).
- 1013 62. T. M. Houslay, J. F. Nielsen, T. H. Clutton-Brock, Contributions of genetic and  
1014 nongenetic sources to variation in cooperative behavior in a cooperative mammal.  
1015 *Evolution; international journal of organic evolution* **75**, 3071-3086 (2021).
- 1016 63. F. R. Day, K. K. Ong, J. R. B. Perry, Elucidating the genetic basis of social interaction  
1017 and isolation. *Nature Communications* **9**, 2457 (2018).
- 1018 64. E. M. McLean, J. A. Moorad, J. Tung, E. A. Archie, S. C. Alberts, Genetic variance and  
1019 indirect genetic effects for affiliative social behavior in a wild primate. *bioRxiv*, (2022).
- 1020 65. A. J. Moore, E. D. Brodie III, J. B. Wolf, Interacting phenotypes and the evolutionary  
1021 process: I. Direct and indirect genetic effects of social interactions. *Evolution;*  
1022 *international journal of organic evolution* **51**, 1352-1362 (1997).
- 1023 66. J. B. Wolf, E. D. Brodie III, J. M. Cheverud, A. J. Moore, M. J. Wade, Evolutionary  
1024 consequences of indirect genetic effects. *Trends in Ecology & Evolution* **13**, 64-69  
1025 (1998).
- 1026 67. P. M. Kappeler, S. Cremer, C. L. Nunn. (The Royal Society, 2015).
- 1027 68. V. Romano, C. Sueur, A. J. J. MacIntosh, The tradeoff between information and  
1028 pathogen transmission in animal societies. *Oikos*, (2021).
- 1029 69. M. N. Zippel, E. A. Archie, J. Tung, J. Altmann, S. C. Alberts, Intergenerational effects  
1030 of early adversity on survival in wild baboons. *eLife* **8**, e47433 (2019).
- 1031 70. B. J. King, *The information continuum: Evolution of social information transfer in*  
1032 *monkeys, apes, and hominids*. (School of American Research Press, 1994).
- 1033 71. S. A. Altmann, *Foraging for survival: yearling baboons in Africa*. (University of  
1034 Chicago Press, 1998).
- 1035 72. L. G. Rapaport, G. R. Brown, Social influences on foraging behavior in young nonhuman  
1036 primates: learning what, where, and how to eat. *Evolutionary Anthropology: Issues,*  
1037 *News, and Reviews: Issues, News, and Reviews* **17**, 189-201 (2008).
- 1038 73. Z. Clay, F. B. de Waal, Development of socio-emotional competence in bonobos.  
1039 *Proceedings of the National Academy of Sciences* **110**, 18121-18126 (2013).
- 1040 74. A. J. Lea *et al.*, Dominance rank-associated gene expression is widespread, sex-specific,  
1041 and a precursor to high social status in wild male baboons. *Proceedings of the National*  
1042 *Academy of Sciences* **115**, E12163-E12171 (2018).
- 1043 75. M. N. Zippel *et al.*, Maternal death and offspring fitness in multiple wild primates.  
1044 *Proceedings of the National Academy of Sciences* **118**, (2021).
- 1045 76. S. Z. Goldenberg, G. Wittemyer, Orphaning and natal group dispersal are associated with  
1046 social costs in female elephants. *Animal Behaviour* **143**, 1-8 (2018).



- 1047 77. M. A. Stanton, E. V. Lonsdorf, C. M. Murray, A. E. Pusey, Consequences of maternal  
1048 loss before and after weaning in male and female wild chimpanzees. *Behavioral Ecology*  
1049 *and Sociobiology* **74**, 22 (2020).
- 1050 78. T. Hasegawa, M. Hiraiwa, Social interactions of orphans observed in a free-ranging troop  
1051 of Japanese monkeys. *Folia primatologica* **33**, 129-158 (1980).
- 1052 79. D. Andres *et al.*, Sex differences in the consequences of maternal loss in a long-lived  
1053 mammal, the red deer (*Cervus elaphus*). *Behavioral Ecology and Sociobiology* **67**, 1249-  
1054 1258 (2013).
- 1055 80. M. Rosenbaum-Feldbrügge, E. Debiasi, The impact of parental death on the timing of  
1056 first marriage. *Demographic Research* **40**, 799-834 (2019).
- 1057 81. R. Sear, R. Mace, Who keeps children alive? A review of the effects of kin on child  
1058 survival. *Evolution and human behavior* **29**, 1-18 (2008).
- 1059 82. J. Altmann, S. C. Alberts, Growth rates in a wild primate population: ecological  
1060 influences and maternal effects. *Behavioral Ecology and Sociobiology* **57**, 490-501  
1061 (2005).
- 1062 83. P. L. Whitten, T. R. Turner, Endocrine mechanisms of primate life history trade-offs:  
1063 Growth and reproductive maturation in vervet monkeys. *American Journal of Human*  
1064 *Biology: The Official Journal of the Human Biology Association* **21**, 754-761 (2009).
- 1065 84. J. D. Jarrett *et al.*, Modeling variation in the growth of wild and captive juvenile vervet  
1066 monkeys in relation to diet and resource availability. *American journal of physical*  
1067 *anthropology* **171**, 89-99 (2020).
- 1068 85. S. E. Johnson, Life history and the competitive environment: trajectories of growth,  
1069 maturation, and reproductive output among chacma baboons. *American Journal of*  
1070 *Physical Anthropology: The Official Publication of the American Association of Physical*  
1071 *Anthropologists* **120**, 83-98 (2003).
- 1072 86. S. C. Strum, Weight and age in wild olive baboons. *American Journal of Primatology* **25**,  
1073 219-237 (1991).
- 1074 87. J. Altmann, *Baboon Mothers and Infants*. (Harvard University Press., Cambridge,  
1075 Massachusetts, 1980).
- 1076 88. S. Maccini, D. Yang, Under the weather: Health, schooling, and economic consequences  
1077 of early-life rainfall. *American Economic Review* **99**, 1006-1026 (2009).
- 1078 89. G. W. Evans, Projected Behavioral Impacts of Global Climate Change. *Annual Review of*  
1079 *Psychology* **70**, 449-474 (2019).
- 1080 90. T. Dinkelman, Long-run Health Repercussions of Drought Shocks: Evidence from South  
1081 African Homelands. *The Economic Journal* **127**, 1906-1939 (2017).
- 1082 91. K. L. Ebi, K. Bowen, Extreme events as sources of health vulnerability: Drought as an  
1083 example. *Weather and Climate Extremes* **11**, 95-102 (2016).
- 1084 92. S. E. Moore *et al.*, Season of birth predicts mortality in rural Gambia. *Nature* **388**, 434-  
1085 434 (1997).
- 1086 93. S. E. Moore, Early life nutritional programming of health and disease in The Gambia.  
1087 *Journal of developmental origins of health and disease* **7**, 123-131 (2016).
- 1088 94. A. J. Lea, J. Altmann, S. C. Alberts, J. Tung, Developmental constraints in a wild  
1089 primate. *The American Naturalist* **185**, 809-821 (2015).
- 1090 95. M. M. Okello *et al.*, Population density of elephants and other key large herbivores in the  
1091 Amboseli ecosystem of Kenya in relation to droughts. *Journal of Arid Environments* **135**,  
1092 64-74 (2016).

- 1093 96. E. A. Carabine, J. Wainwright, C. Twyman, in *Advances in Social Simulation*. (Springer,  
1094 2014), pp. 307-317.
- 1095 97. R. E. Morrison, W. Eckardt, F. Colchero, V. Vecellio, T. S. Stoinski, Social groups buffer  
1096 maternal loss in mountain gorillas. *eLife* **10**, e62939 (2021).
- 1097 98. S. C. Alberts, J. Altmann, Immigration and hybridization patterns of yellow and anubis  
1098 baboons in and around Amboseli, Kenya. *American Journal of Primatology: Official*  
1099 *Journal of the American Society of Primatologists* **53**, 139-154 (2001).
- 1100 99. T. P. Vilgalys *et al.*, Selection against admixture and gene regulatory divergence in a  
1101 long-term primate field study. *Science* **377**, 635-641 (2022).
- 1102 100. P. O. Onyango, L. R. Gesquiere, J. Altmann, S. C. Alberts, Puberty and dispersal in a  
1103 wild primate population. *Hormones and behavior* **64**, 240-249 (2013).
- 1104 101. A. S. Fogel *et al.*, Genetic ancestry predicts male–female affiliation in a natural baboon  
1105 hybrid zone. *Animal Behaviour*, (2021).
- 1106 102. J. Tung, M. J. Charpentier, D. A. Garfield, J. Altmann, S. C. Alberts, Genetic evidence  
1107 reveals temporal change in hybridization patterns in a wild baboon population. *Molecular*  
1108 *ecology* **17**, 1998-2011 (2008).
- 1109 103. A. J. Lea, N. H. Learn, M. J. Theus, J. Altmann, S. C. Alberts, Complex sources of  
1110 variance in female dominance rank in a nepotistic society. *Animal behaviour* **94**, 87-99  
1111 (2014).
- 1112 104. F. Yao, H.-G. Müller, J.-L. Wang, Functional data analysis for sparse longitudinal data.  
1113 *Journal of the American Statistical Association* **100**, 577-590 (2005).
- 1114 105. H. g. Müller, Functional modelling and classification of longitudinal data. *Scandinavian*  
1115 *Journal of Statistics* **32**, 223-240 (2005).
- 1116 106. D. R. Kowal, D. C. Bourgeois, Bayesian function-on-scalars regression for high-  
1117 dimensional data. *Journal of Computational and Graphical Statistics* **29**, 629-638 (2020).
- 1118 107. A. M. Bronikowski *et al.*, The aging baboon: comparative demography in a non-human  
1119 primate. *Proceedings of the National Academy of Sciences* **99**, 9591-9595 (2002).
- 1120 108. A. M. Bronikowski *et al.*, Aging in the natural world: comparative data reveal similar  
1121 mortality patterns across primates. *Science* **331**, 1325-1328 (2011).
- 1122 109. J. M. Robins, S. Greenland, Identifiability and exchangeability for direct and indirect  
1123 effects. *Epidemiology*, 143-155 (1992).
- 1124 110. T. J. VanderWeele, Causal mediation analysis with survival data. *Epidemiology* **22**, 582  
1125 (2011).
- 1126 111. L. A. Gelfand, D. P. MacKinnon, R. J. DeRubeis, A. N. Baraldi, Mediation analysis with  
1127 survival outcomes: accelerated failure time vs. proportional hazards models. *Frontiers in*  
1128 *psychology* **7**, 423 (2016).
- 1129 112. S. Vansteelandt, M. Linder, S. Vandenberghe, J. Steen, J. Madsen, Mediation analysis of  
1130 time-to-event endpoints accounting for repeatedly measured mediators subject to time-  
1131 varying confounding. *Statistics in medicine* **38**, 4828-4840 (2019).
- 1132 113. D. M. Hafeman, T. J. VanderWeele, Alternative assumptions for the identification of  
1133 direct and indirect effects. *Epidemiology*, 753-764 (2011).
- 1134 114. K. Imai, L. Keele, D. Tingley, A general approach to causal mediation analysis.  
1135 *Psychological methods* **15**, 309 (2010).
- 1136 115. R. Huang, R. Xu, P. S. Dulai, Sensitivity analysis of treatment effect to unmeasured  
1137 confounding in observational studies with survival and competing risks outcomes.  
1138 *Statistics in Medicine* **39**, 3397-3411 (2020).



1139 **Acknowledgments**

1140 In Kenya, our research was approved by the Kenya Wildlife Service (KWS), the Wildlife  
1141 Research & Training Institute, the National Environment Management Authority  
1142 (NEMA), and the National Council for Science, Technology, and Innovation  
1143 (NACOSTI). We also thank the University of Nairobi, the Institute of Primate Research,  
1144 the National Museums of Kenya, the members of the Amboseli-Longido pastoralist  
1145 communities, the Enduimet Wildlife Management Area, Ker & Downey Safaris, Air  
1146 Kenya, and Safarilink for their cooperation and assistance in the field. Particular thanks  
1147 go to the Amboseli Baboon Research Project field team (R.S. Mututua, S. Sayialel, J.K.  
1148 Warutere, I.L. Siodi, G. Marinka, B. Oyath) and camp staff. We also thank T. Wango and  
1149 V. Oudu for their untiring assistance in Nairobi, and Jeanne Altmann for her fundamental  
1150 contributions to the Amboseli baboon research. The baboon project database, BABASE,  
1151 was designed and programmed by K. Pinc and is expertly managed by N.H. Learn and  
1152 J.B. Gordon. For a complete set of acknowledgments of funding sources, logistical  
1153 assistance, and data collection and management, please visit  
1154 <http://amboselibaboons.nd.edu/acknowledgements/>.

1155

1156 **Funding:**

1157 National Institutes of Health grant R01AG053308 (SCA)  
1158 National Science Foundation Integrative Organismal Systems grant 1456832 (SCA)  
1159 National Institutes of Health grant P01AG031719 (SCA)  
1160 National Institutes of Health grant R01AG053330 (EAA)  
1161 National Institutes of Health grant R01AG071684 (EAA)  
1162 National Institutes of Health grant R01HD088558 (JT)  
1163 National Institutes of Health grant R01AG075914 (JT)

1164 **Author contributions:**

1165 Conceptualization: ECL, FL, EAA, SCA  
1166 Data Curation: JT, EAA, SCA  
1167 Formal analysis: SZ, FL  
1168 Funding Acquisition: FL, JT, EAA, SCA  
1169 Methodology: ECL, SZ, FAC, FL, EAA, SCA  
1170 Visualization: ECL, SZ  
1171 Resources FL, JT, EAA, SCA  
1172 Supervision: FL, SCA  
1173 Writing—original draft: ECL, SZ  
1174 Writing—review & editing: ECL, SZ, FAC, FL, JT, EAA, SCA

1175 **Competing interests:** Authors declare that they have no competing interests.

1176 **Data and materials availability:** The reproducible code is available at  
1177 [[https://github.com/zengshx777/MFPCA\\_Codebase](https://github.com/zengshx777/MFPCA_Codebase)]. All data used in this study will be  
1178 archived on Duke University Digital Repository.
